# Bacteriophage and their lysins for elimination of infectious bacteria

Sarah O'Flaherty<sup>1,2</sup>, R. Paul Ross<sup>1,3</sup> & Aidan Coffey<sup>4</sup><sup>1</sup>Moorepark Food Research Centre, Teagasc, Fermoy Co., Cork, Ireland; <sup>2</sup>Department of Microbiology, University College Cork, Cork, Ireland;<sup>3</sup>Alimentary Pharmabiotic Centre, University College Cork, Cork, Ireland; and <sup>4</sup>Department of Biological Sciences, Cork Institute of Technology, Bishopstown, Cork, Ireland

**Correspondence:** R. Paul Ross, Moorepark Food Research Centre, Teagasc, Fermoy Co., Cork, Ireland. Tel.: +353 25 42 229; fax: +353 25 42 340; e-mail: [pross@teagasc.ie](mailto:pross@teagasc.ie)

**Present address:** Sarah O'Flaherty, Department of Food, Bioprocessing and Nutrition Sciences, North Carolina State University, Raleigh, NC 27695, USA.

Received 25 August 2008; revised 26 February 2009; accepted 26 February 2009.  
Final version published online 15 April 2009.

DOI:10.1111/j.1574-6976.2009.00176.x

Editor: Ramon Díaz Orejas

## Keywords

bacteriophage; lysin; antibacterial; antibiotic resistance; infection; pathogen.

## Introduction

Bacteriophages (phages) are bacterial parasites, and as such are genetically and structurally simple with life cycles as short as 20–60 min. They have either DNA or RNA as their genetic material encapsulated in a protein coat (Fig. 1). Phages are essentially ubiquitous and are known to infect > 140 bacterial genera and can be regarded as the most abundant biological entities, with estimations of  $10^{31}$  phage particles in the world (Bergh *et al.*, 1989; Whitman *et al.*, 1998). Following their discovery, it became evident that they possess two types of life cycle, lytic (used by both virulent and temperate phages) and lysogenic (used by temperate phages). Generally, phages bind to a receptor on the bacterial cell surface, insert their DNA and hijack the host cell machinery for subsequent replication of DNA and synthesis of phage proteins. Progeny phages then form intracellularly by a self-assembly process before being released following cell lysis (for review see Guttman *et al.*, 2005). In contrast, temperate phages can multiply via the lytic cycle or they can enter the lysogenic cycle by integrating

## Abstract

When phages were originally identified, the possibility of using them as antibacterial agents against pathogens was immediately recognized and put into practise based on the knowledge available at the time. However, with the advent of antibiotics a decline in the use of phage as therapeutics followed. Phages did, however, become more useful in the study of fundamental aspects of molecular biology and in the diagnostic laboratory for the identification of pathogenic bacteria. More recently, the original application of phage as therapeutics to treat human and animal infections has been rekindled, particularly in an era where antibiotic resistance has become so problematic/commonplace. Phage lysins have also been studied and utilized in their own right as potential therapeutics for the treatment of bacterial infections. Indeed the past decade has seen a considerable amount of research worldwide focused on the engineering of phages as antibacterial agents in a wide range of applications. Furthermore, the US Food and Drug Administration and/or the US Department of Agriculture have recently approved commercial phage preparations to prevent bacterial contamination of livestock, food crops, meat and other foods. Such developments have prompted this review into the status of phage research as it pertains to the control of infectious bacteria.

their genome into the host chromosome. When the phage is residing in the chromosome, it is known as a prophage and is replicated along with the bacterial genome during cell replication. In some cases, prophage may encode virulence genes, which can be horizontally transferred from one bacterium to another by transduction (Boyd & Brussow, 2002).

Phages were first described and their viral nature appreciated by Felix d'Herelle in 1917, although their antibacterial activity had been independently recognized by Hankin in 1896, Gamaleya in 1898 and Twort in 1915 (Fig. 2) (Sulakvelidze *et al.*, 2001). D'Herelle subsequently published extensively on phage and helped to establish the International Bacteriophage Institute in Tbilisi, Georgia in 1923 (Summers, 1999; Sulakvelidze, 2001). The Bacteriophage Institute in Tbilisi (now the George Eliava Institute of Bacteriophage, Microbiology and Virology) is still researching phage therapy applications and supplies phage for the treatment of various bacterial infections. For reviews on the history of phage therapy and early human applications, see Summers (1999, 2001) and Sulakvelidze & Kutter (2005).

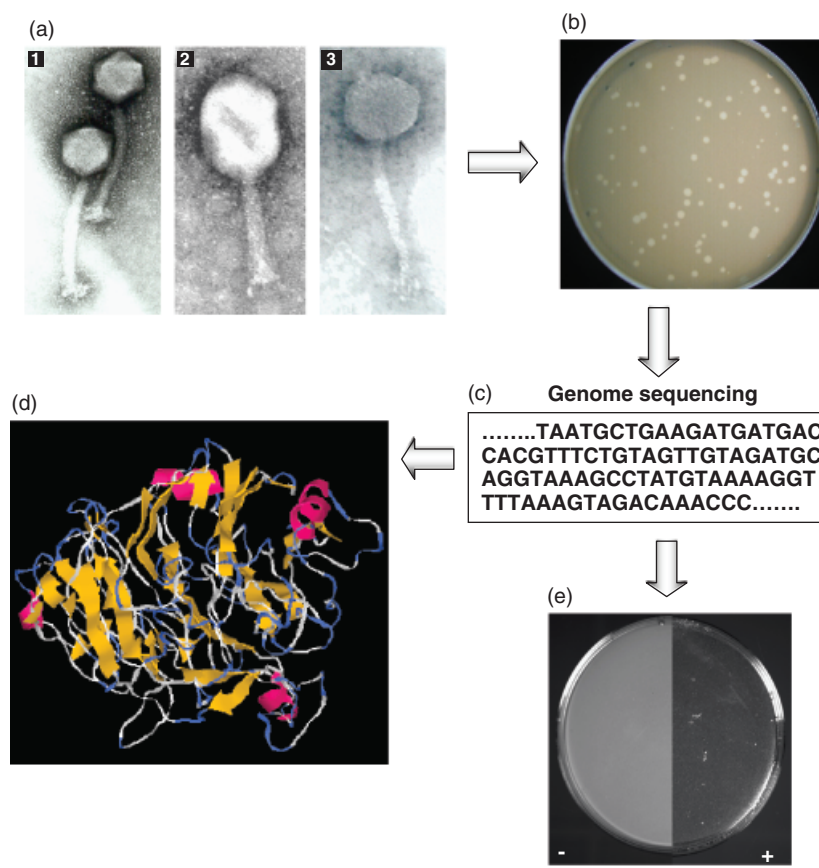

**Fig. 1.** Diagrammatic representation of the potential of phages and phage lysins as therapeutics. (a) Electron Micrographs of three phages infecting three relevant genera: 1, phage K (*Staphylococcus aureus*); 2, phage pp01 (*Escherichia coli*); 3, phage st104b (*Salmonella enterica*). (b) Representative Petri dish showing plaque formation by staphylococcal phage K. (c) Increase in high-throughput techniques and lower costs of sequencing has allowed a large number of phage genomes to be sequenced, which has resulted in the identification of additional valuable phage products such as phage lysin. (d) I-Tasser (Zhang, 2008) prediction of the 3D structure of LysK, which has activity against a wide range of staphylococci. (e) *Staphylococcus aureus* incubated with (+) and without (–) LysK which demonstrates the anti-staphylococcal activity of LysK.

Results of the early phage therapy experiments were variable, with reports of both success and failure. Nevertheless, D'Herelle's first phage therapy experiments against dysentery were extremely promising with elimination of infection being attributed to a phage preparation (Sulakvelidze *et al.*, 2001). Where failures in phage therapy occurred in later years, they could generally be attributed to a variety of factors including (1) a lack of understanding of phage biology, (2) poor experimental techniques, (3) poor quality of phage preparations and (4) a lack of understanding of the underlying causes of ailment being treated. The commercialization of antibiotics in the 1940s led to a concomitant decline in the use of phage as human therapeutics in Western civilizations; however, in the East, exploitation of phage either alone or in combination with antibiotics continued (Sulakvelidze *et al.*, 2001).

In tandem with the resurgence of interest in phages as therapeutics and the advent of high throughput sequencing, the number of phage genomes sequenced to completion has drastically increased in recent years from a number of 105 genomes by 2002 (Rohwer & Edwards, 2002) to the current total of *c.* 520. Analysis of these genomes has led to increased understanding of phage evolution (Hendrix *et al.*, 1999), phage–host interactions (Chibani-Chennoufi *et al.*, 2004a),

bacterial pathogenicity (Boyd & Brussow, 2002), phage ecology (Weinbauer, 2004) and indeed the origin of phages themselves (Hendrix *et al.*, 2000). The past decade has seen a considerable amount of worldwide research focused on the exploitation of phages as antibacterial agents for a wide range of applications. One of the most relevant advances (discussed below) in the use of phages as biocontrol agents occurred in 2006 when the food and drug administration (FDA) approved the use of a six-phage cocktail designated LMP-102™ for use on 'ready to eat' meat to control *Listeria monocytogenes* contamination. In this review, we concentrate on recent phage exploitation as antimicrobials both as intact phage or phage-based products.

### Application of phages in biocontrol and therapeutic design

The increasing incidence of antibiotic resistance in bacterial pathogens has justified a reassessment of the value of phages as antibacterial agents for medical and veterinary applications. Antibiotic resistance is now widespread among pathogens such as *Staphylococcus aureus* (Lowy, 2003), *Salmonella* (Fluit, 2005), *Mycobacterium tuberculosis* (Di Perri & Bonora, 2004), *Acinetobacter* (Jain & Danziger, 2004),

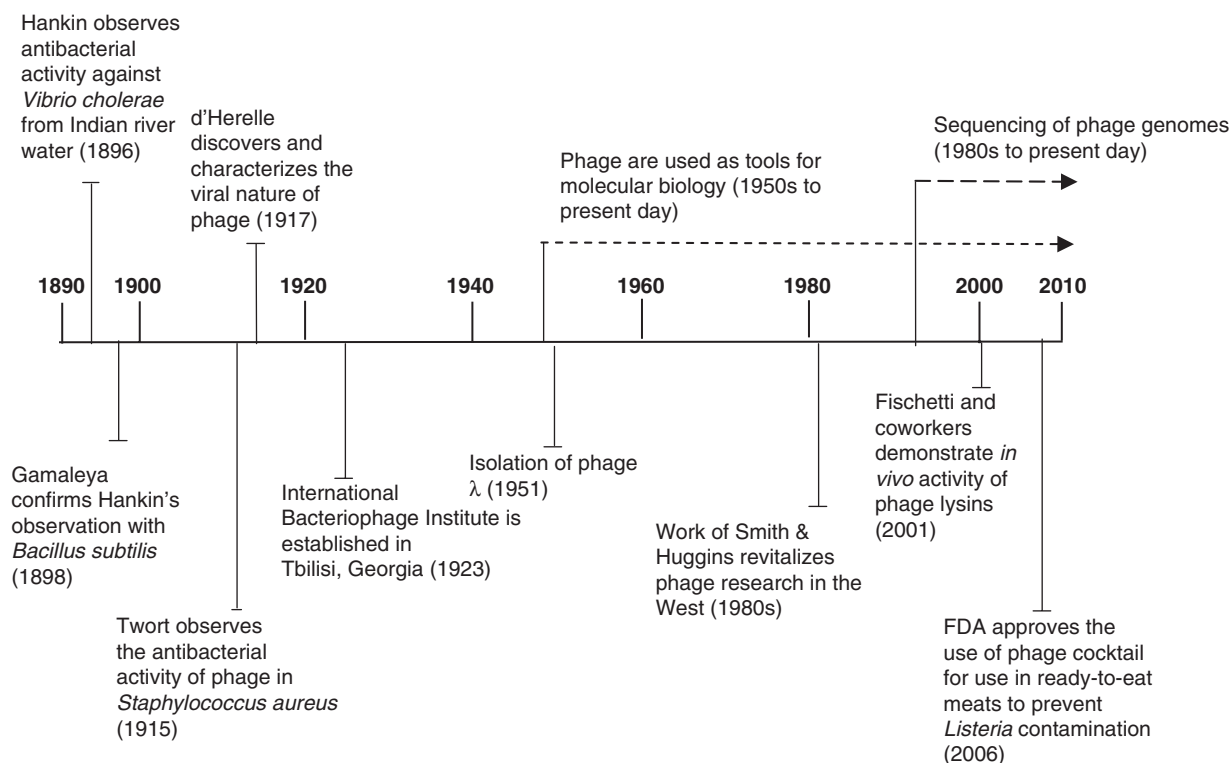

Fig. 2. Timeline of major milestones in phage history.

*Escherichia coli* (Saenz *et al.*, 2004), *Streptococcus pneumoniae* (Jacobs, 2004), *Campylobacter jejuni* (Lindmark *et al.*, 2004), *Helicobacter pylori* (Megraud, 2004), *Pseudomonas aeruginosa* (Ong *et al.*, 2004), *Haemophilus influenzae* (Bozdogan & Appelbaum, 2004) and *Clostridium difficile* (Razavi *et al.*, 2007). Indeed, pharmaceutical industries are investing less in the discovery of novel antibiotics, mainly due to poor returns on their investments (Projan & Shlaes, 2004; Norrby *et al.*, 2005). This problem has intensified the need for the implementation of new effective measures to control infections by bacterial pathogens. These measures include (1) improvements in hospital hygiene and management, (2) stringent control over usage of existing antibiotics, (3) development of novel antibacterial drugs, including peptides and lipids as well as low molecular weight compounds and (4) the re-evaluation of phage therapy in the context of a far deeper understanding of phage biology. The merits of all these measures are considerable and this review will concentrate on the research carried out on the latter.

### Use of phages as antimicrobial agents in humans

A number of reviews written over the past decade have focused on application of phage therapy in humans and certainly much of the work cited comes from the former

Soviet Union states and Poland (Slopek *et al.*, 1983, 1987; Carlton, 1999; Weber-Dabrowska *et al.*, 2000; Chanishvili *et al.*, 2001; Sulakvelidze, 2001; Summers, 2001). Some of these, particularly Sulakvelidze (2001), detail the wide range of infections and illnesses that have been treated successfully. In the recent past, two books on a wide range of phage topics including phage therapy have been published, namely Sulakvelidze & Kutter (2005) and Mc Grath & Van Sinderen (2007).

Looking at the area, it is evident that among the most prominent and comprehensive research in recent years was performed by the Polish group of Gorski and Weber-Dabrowska (Slopek *et al.*, 1983, 1987; Weber-Dabrowska *et al.*, 2000; Gorski *et al.*, 2007) at Wroclaw, Poland, and by the bacteriophage group at the Bacteriophage Institute in Tbilisi, Georgia (Chanishvili *et al.*, 2001).

In Poland, phage preparations were generally administered to patients whose infections were unresponsive to antibiotic therapy. Patients had a wide range of diseases caused by *Staphylococcus*, *Klebsiella*, *Escherichia*, *Proteus* and *Pseudomonas*. The patient ages ranged from 1 week to 86 years of age. Therapeutic phages were generally administered orally three times per day, locally by direct application on wounds or by dropping a phage suspension into the eye, ear or nose. In most cases, bacterial sensitivity to phage was monitored and different phages were applied in situations

where bacteriophage resistance had occurred. In one study, phage therapy results from 550 cases were reported from 1981 to 1986 (Slopek *et al.*, 1987). These results demonstrated that 92.4% of patients were cured, 6.9% of patients showed an improvement in condition in contrast to 0.7% of patients where phage therapy was found to be ineffective (Slopek *et al.*, 1987). Furthermore, in a later study by the same group, similar results were reported. In this case, phage therapy in a group of 1307 patients ranging in age from 4 weeks to 86 years from 1987 to 1999 were investigated (Weber-Dabrowska *et al.*, 2000). Full recovery occurred in 85.9% of cases, an improvement in condition in 10.9% of cases, while no improvement was observed in 3.8% of cases. As with the earlier study, patients had a wide range of bacterial infections caused by the pathogens *Staphylococcus*, *Klebsiella*, *Escherichia*, *Enterobacter*, *Proteus* and *Pseudomonas* (Weber-Dabrowska *et al.*, 2000).

Additional published work by this group highlighted the use of phage therapy to treat chronic suppurative skin infections in 31 patients ranging in age from 12 to 86 years old, whose infections were caused by *Pseudomonas*, *Staphylococcus*, *Klebsiella*, *Proteus*, and *E. coli* (Cislo *et al.*, 1987). Of the 31 cases, 77% showed improvements in condition. However, in the remaining 23%, treatment was stopped either due to a lack of improvement or the development of side effects (Cislo *et al.*, 1987). In another study, bacterial infections in cancer patients were treated with phage therapy (Weber-Dabrowska *et al.*, 2001). In this case, 20 cancer patients ranging in age from 1 to 66 years old had concurrent bacterial infections caused by *S. aureus*, *P. aeruginosa*, *Klebsiella pneumoniae*, *Klebsiella oxytoca* and *E. coli*. Importantly, before phage application, antibiotic treatment in all 20 patients had failed. Patients received phage orally three times a day and the infection was cured in all cases following phage treatment, which varied from 2 to 9 weeks in duration (Weber-Dabrowska *et al.*, 2001). More recently, antibiotic-resistant septicaemia has been treated with phage therapy in 94 patients (Weber-Dabrowska *et al.*, 2003). In 71 of these cases, antibiotic treatment was continued in conjunction with phage therapy and in the remaining 23 cases phage alone was administered. Of the 94 cases, complete recovery was achieved in 85.1% of cases, whereas in 14.9% of cases phage therapy was ineffective. Today phage therapy is generally considered an experimental treatment in Poland where it is administered to patients in whom generally antibiotic therapy has failed (for review see Gorski *et al.*, 2007). Patients and an institutional review board both have to give their consent. In general, the average success of phage therapy is 85%. Although these studies were not set as randomized clinical trials, they clearly indicate a high degree of efficacy of phage therapy to combat bacterial pathogens where antibiotic therapy was not effective. Additional studies are needed where a direct comparison can be made

between phage-treated and -untreated control groups. In addition, considering these cases did not demonstrate a favourable outcome with antibiotic therapy, the option for phage therapy is more than desirable especially in view of the reported success rate.

Other notable work was performed in the former Soviet Union at the Eliava Institute for Bacteriophage, Microbiology and Virology in Tbilisi, Georgia, and this has been reviewed by Chanishvili *et al.* (2001) and Sulakvelidze & Kutter (2005). Mass-produced phages generated at the Eliava Institute were used throughout the entire Soviet Union. These preparations have been successfully used for prophylactic treatment in addition to the treatment of gas gangrene and emergency wound infections in soldiers (Chanishvili *et al.*, 2001). More recently, screening for phages from the Institute's collection was performed using antibiotic-resistant bacteria, including methicillin-resistant *S. aureus* (MRSA) and vancomycin-resistant *Enterococcus* (VRE) as hosts (Chanishvili *et al.*, 2001).

Until recently, relatively little work on the phage therapy topic has been demonstrated in Western Europe and commercial phage preparations have not been available since the early phage products of Eli Lilly and L'Oréal (France) fell into decline. Interestingly, a safety test on phage administration has been performed with human volunteers (Bruttin & Brussow, 2005). In this study, subjects received T4 coliphage orally in their drinking water at a concentration up to  $10^5$  PFU mL<sup>-1</sup>. No adverse effects were identified in subjects receiving phage T4. Human clinical trials with phages have also been initiated by various phage companies to treat ear infections, leg ulcers and burn wounds (Fortuna *et al.*, 2008). For example, Biocontrol Ltd performed a double-blind placebo-controlled phase II clinical trial in the UK with 24 patients. This trial targeted ear infections caused by *P. aeruginosa*. Results demonstrated a 50% reduction of symptoms in the phage-treated group compared with a 20% in the untreated group. In addition, after 3 weeks of phage application the mean bacterial cell numbers in the patient's ears were reduced by 80% in the phage-treated group, whereas the bacterial cell numbers demonstrated a small increase in the untreated group (Fortuna *et al.*, 2008). However, despite the renewed interest in phages as therapeutic agents for human disease and the few initial small-scale human trials, there have been no reports, to date of large-scale human clinical trials. An important use of phage to kill the pathogen *S. aureus* was reported by Jikia *et al.* (2005). In this case the product PhagoBioDerm was used to treat two men from Georgia who were exposed to strontium-90 and subsequently developed *S. aureus* infections. These infections were not treated satisfactorily with typical mediations such as antibiotics and topical ointments. Doctors used PhagoBioDerm (a biodegradable polymer that contains both the antibiotic ciprofloxacin and phage)

designed specifically for wound healing. Interestingly, the *S. aureus* strain treated was shown to be resistant to ciprofloxacin and other antibiotics, therefore the clinical improvements were attributed to the phage impregnated in the product (Jikia *et al.*, 2005). The two men were treated with PhagoBioDerm a month after hospitalization and demonstrated elimination of the *S. aureus* strain 7 days after application. This is an important case as it demonstrates that when conventional medicine had failed, phage application can be successful. Therefore, although there have not been reports of large-case clinical trials, isolated reports of successful phage treatment, where conventional treatment has failed, is encouraging and an argument for the use of phages in these situations is warranted. The knowledge and technology is currently available to screen patients from such cases for specific strains and match with the phage in the laboratory first or apply phage cocktails for treatment as has been successfully carried out for patients in Poland and the former Soviet Union. Therefore at the present time while further research is being undertaken, one could argue that in specific cases phage should most definitely be considered as a treatment option.

### Phages as antimicrobial agents in animal models of human infection

With any new drug or anti-infective, animal models of infection are generally used to evaluate their efficacy. This is also the case with phages, where numerous animal models of infection are used to study phages as potential therapeutics, particularly in the context of antibiotic-resistant infections (Table 1). Chibani-Chennoufi *et al.* (2004b) have quantified phage activities against *E. coli* both *in vitro* and in an *in vivo* model of mice infection. Phages were isolated from environmental water samples and from stool samples of paediatric patients and were subsequently administered to the drinking water of mice. Interestingly, the *in vitro* part of the study demonstrated that the murine intestinal *E. coli* strains were susceptible to phage elimination. However, in the *in vivo* element of the study, the overall titre of *E. coli* was only minimally affected. The authors suggested that the resident *E. coli* were physically or physiologically protected from phage infection. For example, phage infection could have been inhibited due to the presence of large amounts of nontarget bacteria (physical), which may have been in the stationary phase of growth (physiological) (Chibani-Chennoufi *et al.*, 2004b). In addition, phage therapy has been investigated in a mouse model of infection against  $\beta$ -lactamase-producing *E. coli* strains (Wang *et al.*, 2006b). One phage was isolated from hospital sewage and designated  $\Phi$ 9882, which exhibited a broad lytic spectrum against clinical isolates of these antibiotic resistant *E. coli*. Mice were injected with the minimal lethal dose of *E. coli* and mice that

received no phage died within 24 h. In contrast, all mice that received phage  $\Phi$ 9882 [multiplicity of infection (MOI)  $10^4$ ] administered 40 min after the bacterial inoculation survived. However, when phage treatment was delayed by 20 or 60 min, only 60% of the mice survived. This was further reduced to 20% when phages were administered 3 h after the bacteria (Wang *et al.*, 2006b). These researchers used the same strategy to study the efficacy of phage against imipenem-resistant *P. aeruginosa* (Wang *et al.*, 2006a). In this case, treatment with the appropriate phage ( $\Phi$ A392) within 60 min of bacterial inoculation resulted in a 100% survival rate in the mice. All mice that were not treated with phage died within 24 h (Wang *et al.*, 2006a). In a mouse burn wound model, phages were used to control *P. aeruginosa* infection (McVay *et al.*, 2007). A cocktail of three phages was administered intramuscularly, subcutaneously or intraperitoneally to groups containing 18 mice. Overall survival in the control group was 6% compared with survival rates of 22–87% depending on the route of injection with intraperitoneal injections of phages resulting in the most significant protection (87%) (McVay *et al.*, 2007).

Uropathogenic *E. coli* (UPEC) is another emerging multi-drug-resistant pathogen that has recently been targeted with phage (Nishikawa *et al.*, 2008). Phage T4 and a newly isolated phage (KEP10) were examined in mice that were administered with a UPEC strain. Following 7 days, 100% and 90% of mice treated with T4 and KEP10, respectively, at an MOI of 60, had survived (Nishikawa *et al.*, 2008). In the control group, where no phage was administered, all the mice died within 3 days (Nishikawa *et al.*, 2008).

The potential of phage therapy to control *S. aureus* infection in a rabbit model of wound infection has also been reported (Wills *et al.*, 2005). The bacterial strain used in this study had previously caused infection on a rabbit farm. Two groups of eight rabbits were used in a prophylaxis study where both groups received  $8 \times 10^7$  CFU mL<sup>-1</sup> of *S. aureus* and one group received  $2 \times 10^9$  PFU mL<sup>-1</sup> of phage LS2a. One of the eight phage-treated rabbits developed an abscess of 64 mm<sup>2</sup>, compared with the eight in the case of the group of untreated rabbits. These had abscesses ranging from 32 to 144 mm<sup>2</sup>. In addition, in a dose–response study, all but one of 12 rabbits that had received  $8 \times 10^7$  CFU mL<sup>-1</sup> of *S. aureus* formed an abscess. The one rabbit that had no abscess had received the highest dose of phage ( $6 \times 10^7$  PFU mL<sup>-1</sup>). An experiment in which treatment with phage was delayed (6, 12 or 24 h after bacterial injection) was also performed. In this case, all rabbits presented abscesses with no difference in severity between these and the negative control group (Wills *et al.*, 2005).

Biswas *et al.* (2002) used a mouse model to investigate bacteraemia caused by a clinical isolate of VRE. In this case, mice infected with  $10^9$  CFU mL<sup>-1</sup> of enterococci were protected after injection of phage ( $3 \times 10^8$  PFU mL<sup>-1</sup>). These

**Table 1.** *In vivo* and *in situ* phage studies

| Hosts for bacteria                    | Bacteria                                                        | Phages                    | Main outcome                                                                                                                                              | References                      |
|---------------------------------------|-----------------------------------------------------------------|---------------------------|-----------------------------------------------------------------------------------------------------------------------------------------------------------|---------------------------------|
| Animal models for human infection     |                                                                 |                           |                                                                                                                                                           |                                 |
| Mice                                  | <i>Escherichia coli</i> O157:H7                                 | SP15, SP21 and SP22       | Successive daily phage administration was required to reduce cell numbers from the gastrointestinal tract                                                 | Tanji <i>et al.</i> (2005)      |
| Mice                                  | $\beta$ -Lactamase-producing <i>E. coli</i>                     | $\Phi$ 9882               | 100% survival at 24–168 h after phage administration (40 min after bacterial administration)                                                              | Wang <i>et al.</i> (2006b)      |
| Mice                                  | <i>E. coli</i>                                                  | Anti-K1 phage             | Better mice survival rates with phage administration. Bacterial mutants were shown to be of lesser virulence                                              | Smith & Huggins (1982)          |
| Mice                                  | <i>E. coli</i>                                                  | $\Phi$ LW and $\Phi$ LH   | Mortality rates in mice varied depending on the phage used                                                                                                | Bull <i>et al.</i> (2002)       |
| Mice                                  | UPEC                                                            | T4 and KEP10              | 100% survival rate with T4. 90% survival rate with KEP10                                                                                                  | Nishikawa <i>et al.</i> (2008)  |
| Mice                                  | <i>E. coli</i> , <i>Salmonella enterica</i> serovar Typhimurium | $\lambda$ and P22         | Identification, isolation and subsequent use of long circulating phage                                                                                    | Merril <i>et al.</i> (1996)     |
| Mice                                  | <i>Enterococcus faecium</i> (VRE)                               | ENB6                      | 100% survival 45 min after phage administration                                                                                                           | Biswas <i>et al.</i> (2002)     |
| Mice                                  | <i>Enterococcus faecalis</i>                                    | EF24C                     | 100% survival rate with a phage MOI of 0.1                                                                                                                | Uchiyama <i>et al.</i> (2008)   |
| Mice                                  | <i>Pseudomonas aeruginosa</i>                                   | $\Phi$ A392               | 100% survival rate 60 min after phage administration. Reduced survival rates when phages were administered at 180 and 360 min                             | Wang <i>et al.</i> (2006a)      |
| Mice                                  | <i>P. aeruginosa</i>                                            | Pa1, Pa2 and Pa11         | 87% protection against bacterial infection in mouse burn model compared with 6% in the untreated group after intraperitoneal injection                    | McVay <i>et al.</i> (2007)      |
| Mice                                  | <i>P. aeruginosa</i>                                            | CSV-31                    | 100% protection observed when phages were administered 45 min after bacterial challenge                                                                   | Vinodkumar <i>et al.</i> (2008) |
| Mice                                  | <i>Staphylococcus aureus</i> (MRSA)                             | $\Phi$ MR11               | Better mice survival rates with phage administration (MOI > 0.1) straight after bacteria administration                                                   | Matsuzaki <i>et al.</i> (2003)  |
| Guinea pigs                           | <i>P. aeruginosa</i>                                            | BS24                      | Skin graft protection from bacteria by phage                                                                                                              | Soothill (1994)                 |
| Hamster                               | <i>Clostridium difficile</i>                                    | CD140                     | 5/6 hamster survived in the phage-treated group compared with none in the control                                                                         | Ramesh <i>et al.</i> (1999)     |
| Rabbit (wound infection)              | <i>S. aureus</i>                                                | LS2a                      | Reduction in abscess size in phage-treated animals, no difference when phage administration was delayed                                                   | Wills <i>et al.</i> (2005)      |
| Mice                                  | <i>Vibrio vulnificus</i>                                        | CK-2, 153A-5 and 153A-7   | Different results of mice protection depending on the phage used. CK-2 and 153A-5 protected mice, whereas 153A-7 did not                                  | Cervený <i>et al.</i> (2002)    |
| Mice                                  | <i>Klebsiella pneumoniae</i>                                    | SS                        | Immediate administration of phage resulted in 100% protection, this was decreased after 3 h and no protection at 6 h was observed postbacterial challenge | Chhibber <i>et al.</i> (2008)   |
| Other phage trials with animal models |                                                                 |                           |                                                                                                                                                           |                                 |
| Calves, piglets and lambs             | <i>E. coli</i>                                                  | B44/1 and B44/2           | Prevention of <i>E. coli</i> induced diarrhoea                                                                                                            | Smith & Huggins (1983)          |
| Calves                                | <i>E. coli</i>                                                  | Phage cocktail (7 phage)  | Prevention of <i>E. coli</i> induced diarrhoea                                                                                                            | Smith <i>et al.</i> (1987b)     |
| Mice, sheep and cattle                | <i>E. coli</i> O157:H7                                          | SH1 and KH1               | KH1 did not reduce intestinal levels of bacteria in sheep. Reduction but not elimination of <i>E. coli</i> O157:H7 in steers                              | Sheng <i>et al.</i> (2006)      |
| Sheep                                 | <i>E. coli</i> O157:H7                                          | CEV1                      | Reduction (2 logs within 2 days) but not elimination of <i>E. coli</i> O157:H7                                                                            | Raya <i>et al.</i> (2006)       |
| Chickens                              | <i>E. coli</i>                                                  | R                         | Protection of septicaemia and meningitis-like infections even when phage administration was delayed. Phage multiplied in the blood                        | Barrow <i>et al.</i> (1998)     |
| Chickens                              | <i>S. enterica</i> serovar Enteritidis                          | CNPSA1, CNPSA3 and CNPSA4 | Reduction of <i>Salmonella</i> in caecal contents                                                                                                         | Fiorentin <i>et al.</i> (2005)  |
| Chickens                              | <i>S. enterica</i> serovar Typhimurium                          | S2a, S9 and S11           | Beneficial effect on weight gain and reduction in <i>Salmonella</i> numbers in the caecum with phage cocktail                                             | Toro <i>et al.</i> (2005)       |

Table 1. Continued.

| Hosts for bacteria                                       | Bacteria                                                        | Phages                        | Main outcome                                                                                                                | References                                                |
|----------------------------------------------------------|-----------------------------------------------------------------|-------------------------------|-----------------------------------------------------------------------------------------------------------------------------|-----------------------------------------------------------|
| Chickens                                                 | <i>S. enterica</i> serotypes Enteritidis, Hadar and Typhimurium | Φ151 Φ25 and Φ10              | Reduction of caecal cell numbers with Φ151 and Φ10 but not Φ25                                                              | Atterbury <i>et al.</i> (2007)                            |
| Chickens                                                 | <i>Campylobacter jejuni</i>                                     | 69 and 71                     | Reduction of <i>C. jejuni</i> in caecal contents                                                                            | Wagenaar <i>et al.</i> (2005)                             |
| Chickens                                                 | <i>C. jejuni</i>                                                | CP8 and CP34                  | Reduction of <i>C. jejuni</i> in caecal contents. Resistant bacteria were less virulent and reverted to phage sensitivity   | Loc Carrillo <i>et al.</i> (2005)                         |
| Chickens                                                 | <i>E. coli</i>                                                  |                               | Various results (see text)                                                                                                  | Huff <i>et al.</i> (2002a, b, 2003a, b, 2004, 2005, 2006) |
| Yellowtail fish                                          | <i>Lactobacillus garvieae</i>                                   | PlgY-16                       | Protection against infection after phage administration                                                                     | Nakai <i>et al.</i> (1999)                                |
| Ayu fish                                                 | <i>Pseudomonas plecoglossicida</i>                              | PPpW-3 and PPpW-4             | Reduced mortality rates in fish that had received phage                                                                     | Park <i>et al.</i> (2000)                                 |
| Holstein cows                                            | <i>S. aureus</i>                                                | K                             | The cure rate (16.7%) in the phage-treated group was not significantly improved compared with the untreated group           | Gill <i>et al.</i> (2006a)                                |
| Phage trials with food                                   |                                                                 |                               |                                                                                                                             |                                                           |
| Melon and apple                                          | <i>S. enterica</i> serovar Enteritidis                          | Phage cocktail                | Reduction of cell numbers on melon slices. No significant difference between phage-treated and -untreated samples on apples | Leverentz <i>et al.</i> (2001a)                           |
| Cheese                                                   | <i>Listeria monocytogenes</i>                                   | P100                          | Reduction and/or elimination of <i>L. monocytogenes</i> cell numbers on smear ripened cheese surfaces                       | Carlton <i>et al.</i> (2005)                              |
| Melon and apple                                          | <i>L. monocytogenes</i>                                         | Phage cocktail                | Reduction of <i>L. monocytogenes</i> cell numbers more effective on melon slices than apple slices                          | Leverentz <i>et al.</i> (2003)                            |
| Tomato, spinach, broccoli, ground beef and hard surfaces | <i>E. coli</i> O157:H7                                          | Three phage cocktail; ECP-100 | Successful reduction of bacterial numbers at a concentration of 10 <sup>9</sup> PFU mL <sup>-1</sup>                        | Abuladze <i>et al.</i> (2008)                             |
| Chicken skin                                             | <i>C. jejuni</i>                                                | Φ2                            | Reduction of <i>C. jejuni</i> numbers                                                                                       | Atterbury <i>et al.</i> (2003)                            |
| Chicken skin                                             | <i>C. jejuni</i> and <i>S. enterica</i> serovar Enteritidis     | Phages 12673, 12, HTint, 29C  | Reduction of cell numbers on treated chicken skins                                                                          | Goode <i>et al.</i> (2003)                                |
| Frankfurters                                             | <i>S. enterica</i> serovar Typhimurium DT104                    | Felix 01 variant              | Reduction of cell numbers on treated frankfurters                                                                           | Whichard <i>et al.</i> (2003)                             |
| Beef steaks                                              | <i>Pseudomonas</i> spp.                                         |                               | Increased retail shelf life of beef                                                                                         | Greer (1986)                                              |
| Beef steaks                                              | <i>Pseudomonas</i> spp.                                         | Phage cocktail                | Retail case life of steaks treated with the phage cocktail was not significantly different than control steaks              | Greer & Dilts (1990)                                      |
| Pork adipose tissue                                      | <i>Brochothrix thermosphacta</i>                                | A3                            | Increase in shelf life from 4 to 8 days                                                                                     | Greer & Dilts (2002)                                      |
| Phage trials with biofilms                               |                                                                 |                               |                                                                                                                             |                                                           |
| Polysaccharide capsule                                   | <i>E. coli</i>                                                  | K29                           | This phage demonstrated the ability to penetrate the polysaccharide capsule of <i>E. coli</i> .                             | Bayer <i>et al.</i> (1979)                                |
| Biofilm                                                  | <i>E. coli</i>                                                  | T4                            | <i>E. coli</i> in biofilms was successfully lysed with phage T4                                                             | Doolittle <i>et al.</i> (1995)                            |
| Biofilm                                                  | <i>E. coli</i>                                                  | Modified T7                   | Engineered phage reduced biofilm cell counts by over 99%                                                                    | Lu & Collins (2007)                                       |
| Stainless steel and polypropylene surfaces               | <i>L. monocytogenes</i>                                         | H387, H387-A and 2671         | Synergistic effect observed with a quaternary ammonium compound and phage                                                   | Roy <i>et al.</i> (1993)                                  |
| Biofilm                                                  | <i>Pseudomonas fluorescens</i>                                  | ΦS1                           | 85% reduction in biofilm mass                                                                                               | Sillankorva <i>et al.</i> (2004)                          |
| Biofilm                                                  | <i>S. aureus</i>                                                | K                             | Reduction in biofilm mass varied depending on strain tested                                                                 | Cerca <i>et al.</i> (2007)                                |

researchers also demonstrated that the survival rate was reduced to 50% when phage treatment was deliberately delayed (18 and 24 h) in mice that were moribund (Biswas *et al.*, 2002). Furthermore, it was demonstrated that the recovery of the bacteraemic mice was not due to a non-specific immune effect but instead was clearly associated with the antibacterial activity of the phage (Biswas *et al.*, 2002). More recently, treatment with phage EF24C has been associated with prevention of *E. faecalis* sepsis in a mouse model of infection (Uchiyama *et al.*, 2008). This phage whose genome has also been sequenced, saved 100% of mice from sepsis at an MOI of 0.1 (Uchiyama *et al.*, 2008).

Cervený *et al.* (2002) examined the potential use of phages as therapeutic agents against *Vibrio vulnificus* infection in a mouse model. *Vibrio vulnificus* is a Gram-negative opportunistic pathogen of humans, which contaminates filter-feeding shellfish such as oysters (Linkous & Oliver, 1999). In one study, two groups of four mice were injected intravenously with  $10^6$  CFU mL<sup>-1</sup> of *V. vulnificus* and immediately injected with  $10^8$  PFU mL<sup>-1</sup> of phage CK-2 (test group) or phosphate-buffered saline containing 0.01% (w/v) gelatin (control group). The survival rates of control mice were 0% compared with complete survival in the phage-treated mice (Cervený *et al.*, 2002).

The studies discussed in this section and Table 1 demonstrate the importance of mouse models and other animal models of infection. These studies were performed under different conditions and demonstrate that there is no universal experimental condition set for phage therapy. Furthermore these studies illustrate the importance of timing, MOI and route of phage administration. Phage efficiency was reduced when administration was delayed in some cases for less than an hour, where in other cases phages were efficient when treatment was delayed over a number of days. These results indicate the importance of work performed by Merrill *et al.* (1996) (discussed below) for the selection of long circulating phages. In addition, some studies demonstrated varied results depending on the route of administration. Therefore before phages are administered to humans and animals for treatment (especially for new phages) animal models are an important initial step to help determine potential experimental conditions down the line such as route and timing of administration, MOI, etc. In addition, phage sequencing should be performed to ensure that there is no presence of toxic genes and that virulent phages are used for therapy. The latter is an important criterion for the selection of phages for therapeutic purposes. The magnitude of this criterion is reflected in a significant recent study by Chen & Novick (2009), which demonstrated intergeneric transfer of toxin genes between *S. aureus* and *L. monocytogenes* by transducing phage.

## Veterinary applications of phages

In addition to pathogens affecting humans, the use of phage as therapeutics to treat infections in animals themselves and to prevent the carriage of pathogens that might subsequently get into the food system is another vital area of phage research (Table 1). The important and much-cited research by Smith and Huggins in the 1980s at the Institute for Animal Disease Research in Houghton, Cambridgeshire, was the first substantial phage therapy study in Western Europe after the antibiotic era (Smith & Huggins, 1982, 1983; Smith *et al.*, 1987b, c). In one of these experiments, single intramuscular injection of  $3 \times 10^8$  PFU mL<sup>-1</sup> of phage gave complete protection to mice, which had been injected with a potentially lethal dose of  $3 \times 10^8$  CFU mL<sup>-1</sup> of *E. coli* K1 (Smith & Huggins, 1982). During these experiments, some resistant cells were found, for example in mice inoculated with *E. coli* K1 and phage, 15 out of 360 *E. coli* isolates were K1 negative; however, these mutants were less virulent (Smith & Huggins, 1982). Furthermore, Smith & Huggins (1982) demonstrated that a single dose of phage was more effective than multiple doses of antibiotics such as ampicillin, tetracycline and chloramphenicol. This group also successfully used phage to prevent *E. coli*-induced diarrhoea in calves, piglets and lambs (Smith & Huggins, 1983). Administered as a prophylactic, a mixture of two phages protected calves against a potentially lethal dose of *E. coli* O9:K30,99 (Smith & Huggins, 1983). Furthermore, calves in pens previously occupied by calves that had been treated for diarrhoea by phage were also protected from developing diarrhoea (Smith *et al.*, 1987b). Interestingly, Bull *et al.* (2002) have repeated the experiments of Smith and Huggins achieving similar results, with different phages and *E. coli* strains. This group found that mortality rates in mice varied depending on the phage used. This work by Smith and Huggins was very important as it reawakened the possibility of using phage to successfully cure bacterial infections, and many researchers in the West subsequently started to investigate this field.

More recently, reports of the use of phages to control *E. coli* O157:H7 numbers in sheep and cattle have been reported (Sheng *et al.*, 2006). Although sheep and cattle do not suffer from *E. coli* O157:H7 infection, they are considered as important reservoirs of the pathogen to the human population and hence a decrease in *E. coli* O157:H7 carriage by these animals is warranted. In the first study, Sheng *et al.* (2006) used two phages, SH1 and KH1 to limit bacteria numbers in mice, sheep and cattle. While SH1 (which was more effective than KH1) did not eliminate all bacteria, the numbers of *E. coli* O157:H7 was reduced in steers treated with SH1 alone or a combination of SH1 and KH1, compared with control animals.



Attempts to treat bovine mastitis infection caused by *S. aureus* with phage have also been reported (Gill *et al.*, 2006a). However, Gill *et al.* (2006a) found that the cure rate (16.7%) in the phage-treated group was not significantly improved compared with the untreated group. Phage K, which was evaluated against mastitis-causing staphylococci was shown to have a surprisingly broad host range within the entire genus *Staphylococcus* (O'Flaherty *et al.*, 2005d). Indeed, genome analysis by O'Flaherty *et al.* (2004) demonstrated that phage K was exclusively lytic and its entire 127-kb genome possessed no GATC (Sau3A) restriction sites. Where phage resistance, due to restriction modification activity, was encountered in staphylococci, it could be circumvented by generating modified phage K (O'Flaherty *et al.*, 2005d). Interestingly, studies with this phage showed that phage K activity was inhibited in raw bovine milk and whey (O'Flaherty *et al.*, 2005b; Gill *et al.*, 2006b). The poor lytic activity of phage in the raw milk environment may be due to immunoglobulin activity against the target bacteria resulting in clumping (O'Flaherty *et al.*, 2005b). This phenomenon may explain the poor efficacy reported to treat some infections such as mastitis with phage (Gill *et al.*, 2006a). Given the drug-resistant nature of this pathogen further work, including isolating additional anti-staphylococcal phage (O'Flaherty *et al.*, 2005c) and/or using anti-staphylococcal phage lysins (Fig. 1, Obeso *et al.*, 2008), is warranted.

Treatment of respiratory infections caused by *E. coli* in chickens, with phage therapy has also been investigated. These researchers found phage therapy to be ineffective in successive experiments where the phage was administered in drinking water (Huff *et al.*, 2002b). In addition, the efficacy of either aerosol or intramuscular injection of phage to treat an *E. coli* infection in broiler chickens was studied (Huff *et al.*, 2003b). In this case, an intramuscular injection of phage reduced mortality from 53% to 17%, 46% to 10%, and 44% to 20% when given immediately (0), 24, or 48 h after challenge with  $10^4$  CFU mL<sup>-1</sup> of *E. coli*, respectively. *Salmonella* infection and carriage in chickens and broilers has also been treated with phage (Fiorentin *et al.*, 2005; Toro *et al.*, 2005). In one study, after oral administration of phage, *Salmonella enterica* serovar Enteritidis CFU levels were reduced by only 3.5-fold per gram in the caecal contents of broilers after 5 days (Fiorentin *et al.*, 2005). In another study, Toro *et al.* (2005) used a *Salmonella*-specific phage cocktail to reduce *Salmonella enterica* serovar Typhimurium colonization in chickens. A reduction in *Salmonella* numbers in the caecum and ileum was observed in phage-treated birds. In addition, the phage cocktail caused a beneficial effect on weight gain performance (Toro *et al.*, 2005). Like *E. coli* and *Salmonella*, *C. jejuni* is a member of the normal commensal microbial community of broiler chickens. This zoonotic bacterium is pathogenic to humans and can be

passed along the food chain in meat products. In a biocontrol study by Wagenaar *et al.* (2005), phages were administered for 6 days starting 5 days after bacterial colonization. Initially, results showed a 3-log decrease in *Campylobacter* numbers in the caeca, which stabilized to a 1-log reduction after 5 days. Another study by Loc Carrillo *et al.* (2005) described a reduction in numbers of *Campylobacter* in caecal contents in the phage-treated group over 5 days. Resistant bacteria were isolated, but following analysis, these later reverted to a phage-sensitive phenotype.

The use of phage therapy to control fish pathogens has also been reported. Drug-resistant bacteria can be a particular problem in aquaculture; hence, there is potential for phage application in this area (Nakai & Park, 2002). The protective effects of phage against infection by *Lactobacillus garvieae* in yellowtail fish were demonstrated after intraperitoneal or oral administration of phages. In this study, 100% of fish inoculated with *L. garvieae* survived following phage administration, compared with only 10% survival in the control group, where no phage was administered (Nakai *et al.*, 1999). Protection was also reported against *Pseudomonas plecoglossicida* infection in Ayu fish (*Plecoglossus altivelis*) with phage administration (Park *et al.*, 2000). In one trial, fish were first orally challenged with *P. plecoglossicida* in pellets ( $10^7$  CFU g<sup>-1</sup>). Fifteen minutes later the fish were then administered with phage-impregnated ( $10^7$  PFU g<sup>-1</sup>) or phage-free feed. Following 2 weeks, the mortality rate in fish that received the phage-free feed was 65% ( $n=40$ ). However, the mortality rate was 22.5% ( $n=40$ ) in fish that received the phage-impregnated feed. Interestingly, no neutralizing antibodies were detected in either study (Nakai & Park, 2002). Importantly, these researchers extended their studies to a field trial where phage-impregnated feed was administered to Ayu fish in a pond. In this case, the disease was not artificially induced but occurred naturally in the pond. Mortality rates ( $c.$  18 kg or 900 fish per day) had decreased by a third when compared with the control group (Park & Nakai, 2003).

The work of Smith and Huggins (Smith & Huggins, 1983; Smith *et al.*, 1987a, b) interestingly described phage-resistant mutants of *E. coli*, which emerged after phage therapy in calves. These mutants were greatly reduced in virulence when compared with the parent *E. coli* strain. Apart from the emergence of mutants another potential problem with the administration of phage in animal and human systems is the elimination of phage by the host immune system. A discovery, which circumvented this problem, was reported by Merrill *et al.* (1996). Specific strains of phage were identified, which survived longer than normal in the murine circulatory system. These so-called 'long-circulating' phage variants were selected for *E. coli* phage  $\lambda$  and *Salmonella* phage P22 in mice. Furthermore, these mutants were subsequently shown to be more effective in protecting mice from

bacteraemia than the parental phage strains (Merrill *et al.*, 1996).

An advantage to the use of phages to treat animal models of infection may mean less stringent regulations, which in turn would be advantageous to the study of phage therapy as a whole. However, it is evident from these studies that careful phage selection is required in addition to careful selection of experimental conditions. In addition, phage sequencing, the use of cocktails to prevent resistance, studies on the route and timing of phage administration and environmental monitoring of phage for use in large animal trials are needed.

### The use of phages as biocontrol agents against undesirable biofilms

Biofilms are the accumulation of microbial cells and their excreted products attached to living or inert surfaces. These excreted products include exopolysaccharide and various proteins. Food, pharmaceutical and environmental processing equipment, medical catheters, implants, shunts and prostheses can all become coated in biofilms, with concomitant contamination problems. Thus the removal of these films represents a major challenge. Moreover, bacteria embedded within the biofilm matrix are less accessible to antimicrobial agents, including phages. Interestingly, some phages, have been shown to possess enzymes that can degrade bacterial polysaccharide. An example is coliphage K29, which is capable of penetrating the polysaccharide capsule of *E. coli* and successfully causing lytic infection (Bayer *et al.*, 1979). In another study, Doolittle *et al.* (1995) lysed *E. coli* in biofilms using coliphage T4. These researchers also traced the interaction of the coliphage and biofilms with fluorescent and chromogenic probes (Doolittle *et al.*, 1996). Phages have also been used in combination with other antibiofilm treatments. For example, the application of *Listeria* phage with a quaternary ammonium compound displayed a synergistic effect. In this study, a significant reduction in *L. monocytogenes* numbers was observed on stainless steel and polypropylene surfaces (Roy *et al.*, 1993). An 85% reduction in *Pseudomonas fluorescens* biofilm mass was observed after treatment with phage  $\Phi$ S1 (Sillankorva *et al.*, 2004). Recently, two staphylococcal phage lysins were evaluated for activity against biofilms of *S. aureus* (Sass & Bierbaum, 2007). In this case, the recombinant phage lysin from  $\Phi$ 11 successfully hydrolyzed staphylococcal biofilms. In addition, Cerca *et al.* (2007) showed that phage K was successful in reducing *S. epidermidis* biofilm biomass after a 24-h challenge. Phages have also been successfully engineered to express an enzyme, DspB, which hydrolyzes an adhesion crucial for biofilm formation by *Staphylococcus* and *E. coli* (Lu & Collins, 2007). The engineered T7 phage reduced *E. coli* bacterial biofilm cell counts by over 99%. The

above reports provide evidence that phage do have potential in controlling biofilms and emphasizes the need for continued development of phage and phage-encoded enzymes for this application.

### The use of phages as biocontrol agents for food protection

Control of bacterial pathogens, which may be present on fresh fruit and vegetables and ready to eat foods, is a major concern because these foods do not generally undergo any further processing or cooking that would kill pathogens before consumption. The existing literature would suggest that phages also have potential applications in the control of pathogens in these circumstances (Goodridge, 2004; Sulakvelidze & Barrow, 2005). Hence, because phages are applied in a nonmedical setting, the regulations governing their application might not be as stringent as for medical applications. Specific studies describing the application of phages to control food pathogens on fruits and vegetables are outlined below. Leverentz and colleagues at the US Department of Agriculture (USDA) in Maryland studied the use of phages to control a variety of bacterial pathogens on freshly cut produce focusing their attention on honey dew melons and apples (Leverentz *et al.*, 2001, 2003, 2004). These researchers demonstrated a reduction of 3.5 log in *S. enterica* serovar Enteritidis on melon slices stored between 5 and 10 °C, which was a greater reduction when compared with chemical sanitizers (Leverentz *et al.*, 2001). However, no significant decrease on apple slices was observed (Leverentz *et al.*, 2001). These researchers also combined phage with the bacteriocin nisin for the control of *L. monocytogenes* on fresh cut apples and melons. Phage alone reduced *L. monocytogenes* counts by between 2 and 2.6 logs on melon slices following two applications of phage cocktails. The inclusion of nisin resulted in a decrease of 5.7 logs (Leverentz *et al.*, 2003). These researchers also recently optimized the phage concentration and timing of phage application via aerosol on freshly cut honeydew melons (Leverentz *et al.*, 2004). In a different study, *L. monocytogenes* contamination was also controlled on surface-ripened red smear soft cheese by at least 3.5 logs with *Listeria* phage P100 (Carlton *et al.*, 2005).

Phages have also been evaluated to reduce *C. jejuni* numbers on chicken skin at 4 and -20 °C (Atterbury *et al.*, 2003). In this study, the highest titre of phage ( $10^7$  PFU mL<sup>-1</sup>) gave the most promising results. A 10-fold reduction in samples stored at 4 °C and a 2.5 log reduction in samples stored at -20 °C was obtained. In a separate study, inoculation of chicken skins with  $10^4$  CFU mL<sup>-1</sup> of *C. jejuni* and subsequent administration of phage ( $10^6$  PFU cm<sup>-2</sup>) resulted in a 95% reduction of *C. jejuni* numbers (Goode *et al.*, 2003). This group also studied the reduction of *S. enterica* serovar Enteritidis on chicken skin.

Following phage administration, a 99% reduction in bacterial numbers was observed when compared with the controls where no phages were applied (Goode *et al.*, 2003). In another study, the inhibition of *S. enterica* serovar Typhimurium DT104 on frankfurters has been assessed (Whichard *et al.*, 2003). In this case two phages were used, Felix 01 and a mutant of Felix 01, which had increased lytic activity against *S. enterica* serovar Typhimurium DT104 *in vitro*. Phage Felix 01 and the mutant phage reduced cell numbers by 1.8 and 2.1 logs, respectively, when compared with nontreated frankfurters. In addition, phage Felix 01 has demonstrated the ability to survive acidic conditions and to lyse a broad range of *S. enterica* species (O'Flynn *et al.*, 2006). Furthermore, phage-resistant derivatives of the *S. enterica* strain tested exhibited an irregular colony morphology indicating that the unusual morphology is due to reversion to phage sensitivity and consequent cell death within the colony as it forms (O'Flynn *et al.*, 2007).

The shelf life of food is an important factor in the food-processing industry. Accordingly, phages have also been assessed in this context. For example, the shelf life of beef steaks was almost doubled (from 1.6 to 2.9 days) by phage-mediated control of *Pseudomonas* (Greer, 1986). However, in a different study, the utilization of a cocktail of seven phages, which was active against 57.2% of *Pseudomonas* isolates *in vitro* proved unsuccessful in the same application (Greer & Dilts, 1990). Nevertheless, these researchers did demonstrate the control of the pork spoilage organism *Brochothrix thermosphacta* with phage (Greer & Dilts, 2002). In this case, the storage life of pork adipose tissue treated with phage was increased from 4 to 8 days when compared with the non-phage-treated control (Greer & Dilts, 2002). In another meat study, *E. coli* O157:H7 was successfully reduced or eliminated on meat surfaces by O'Flynn *et al.* (2004) with a coliphage cocktail.

As a result of the resurgence and studies into the possibility of using phage as antibacterials, a natural transition is the establishment of companies to market and get regulatory approval for phage-based products. In fact, numerous companies have developed or are in the process of developing phage-based products and in some cases, discussed here, already have received regulatory approval. This is an important step for the study and promotion of phages and their lysins as novel antibacterials.

Omnilytics, a phage company based in the United States, which sells phage cocktails for use in agriculture, has been using phages in greenhouses and fields to prevent disease on crops for over 10 years (<http://www.phage.com/home5.html>). Their AgriPhage™ product is marketed to farmers as a natural, safe and effective treatment especially for bacterial spot infections. AgriPhage™ is currently approved by the EPA and has OMRI (Organic Material Review Institute) listing for the control of bacterial spot

(caused by *Xanthomonas campestris* pv. *vesicatoria*) and bacterial speck (caused by *Pseudomonas syringae* pv. *tomato*). In addition, this company is in the process of seeking approval from the EPA and OMRI for the control of bacterial canker (caused by *Clavibacter michiganensis* ssp. *michiganensis*) and received no objections from the USDA's Food Safety and Inspection Service for the use of anti-*E. coli* O157:H7 and *Salmonella* phage on live animals before slaughter and for the use of *Salmonella* phage on poultry. In addition, Intralytix (<http://www.intralytix.com>), received FDA approval in 2006 and EPA approval in 2008 for the use of a six-phage cocktail designated LMP-102™ for use on ready to eat meat, poultry products and in food-processing plants to control *L. monocytogenes* contamination (Lang, 2006). This company is also seeking approval from the FDA for phage-based product against *E. coli* O157:H7.

In Europe, a company based in the Netherlands, EBI Food Safety, has been granted generally recognized as safe (GRAS) status from the FDA and USDA for the phage product; LISTEX™, for food products against *L. monocytogenes* (Fortuna *et al.*, 2008). Therefore, this product is exempt from formal premarket safety review. In addition, LISTEX™ is considered organic under EU law as it has been recognized by the Dutch regulatory body (<http://www.ebifoodsafety.com>). To date, phage-approved products discussed above are to treat food-related products. Many of these companies are also investigating phage-based products for animal and human use. For example Novolytics, a UK-based company is actively researching the use of phage against drug-resistant bacteria such as MRSA. This company is currently producing phage under GMP (Good Manufacturing Practices) conditions. The UK Medicines and Healthcare products Regulatory Agency has given outline approval and the company plans to start toxicity testing and phase I clinical trials, with the subsequent commencement of phase IIA clinical trials (N. Mann, pers. commun.; <http://www.novolytics.co.uk/>). These developments will provide a chance to observe consumer response and attitude to the use of phage on food. It will also be interesting to see if this development will pave the way for consumer acceptance and the approval by regulatory bodies for other phage preparations or products.

## Phage lysins as therapeutics

The vast amount of genetic information accumulated from phage genomic sequencing may be seen as a blueprint from which to design novel antimicrobial agents. In this respect, our current mechanistic knowledge of how phage exploit host biosynthetic machinery and eventually lyse the cell is very important. Possibly the best example of this is phage lytic enzymes and indeed, increased research into the utilization of phage lysins as therapeutics is evident

**Table 2.** Phage lysins that have been tested in animal models

| Bacteria                                                        | Phages           | Lysins | Activity                     | References                                                                                                                                                                                  |
|-----------------------------------------------------------------|------------------|--------|------------------------------|---------------------------------------------------------------------------------------------------------------------------------------------------------------------------------------------|
| <i>Streptococcus pneumoniae</i>                                 | Cp1              | Cpl-1  | Muramidase                   | Loeffler <i>et al.</i> (2001, 2003); Jado <i>et al.</i> (2003); Loeffler & Fischetti (2003); Entenza <i>et al.</i> (2005); McCullers <i>et al.</i> (2007); Grandgirard <i>et al.</i> (2008) |
| <i>Streptococcus pneumoniae</i>                                 | Dp-1             | Pal    | Amidase                      | Jado <i>et al.</i> (2003); Loeffler & Fischetti (2003)                                                                                                                                      |
| <i>Streptococcus pyogenes</i>                                   | C1               | C1     | Amidase                      | Nelson <i>et al.</i> (2001)                                                                                                                                                                 |
| <i>Bacillus anthracis</i>                                       | $\gamma$         | PlyG   | Amidase                      | Schuch <i>et al.</i> (2002)                                                                                                                                                                 |
| <i>Bacillus anthracis</i>                                       | *                | PlyPH  | Amidase                      | Yoong <i>et al.</i> (2006)                                                                                                                                                                  |
| <i>Enterococcus faecalis</i> and<br><i>Enterococcus faecium</i> | Phi1             | PlyV12 | Amidase                      | Yoong <i>et al.</i> (2004)                                                                                                                                                                  |
| <i>Staphylococcus aureus</i>                                    | MR11             | MV-L   | Endopeptidase and amidase    | Rashel <i>et al.</i> (2007)                                                                                                                                                                 |
| GBS                                                             | Phage NCTC 11361 | PlyGBS | Muramidase and endopeptidase | Cheng <i>et al.</i> (2005)                                                                                                                                                                  |

\*This lysin was identified and amplified from the *Bacillus anthracis* Ames strain (Schuch *et al.*, 2002).

**Table 3.** Advantages and disadvantages of phage and lysin to treat infectious bacteria

|                                                                                                                                                                                                                                                                                                                                                                                                                                                                                                                                                                                     |                                                                                                                                                                                                                                                                                                                                                                                                                           |
|-------------------------------------------------------------------------------------------------------------------------------------------------------------------------------------------------------------------------------------------------------------------------------------------------------------------------------------------------------------------------------------------------------------------------------------------------------------------------------------------------------------------------------------------------------------------------------------|---------------------------------------------------------------------------------------------------------------------------------------------------------------------------------------------------------------------------------------------------------------------------------------------------------------------------------------------------------------------------------------------------------------------------|
| <b>Phage advantages</b><br>Easy to isolate and propagate<br>Can overcome resistance<br>Self-replicating<br>Act synergistically in a cocktail or in combination with other antibiotics<br>Inhibits Gram-positive and Gram-negative organisms<br>Some phage products have regulatory approval or GRAS status<br>Potential for use in numerous environments (human, animal, food, biofilm, etc.)<br>Historically have been in use for nearly a century<br>Possibility to genetically engineer phage<br>Specific bacterial targets<br>Could be used as a prophylactic and for treatment | <b>Lysin advantages</b><br>Not self-replicating, more targeted defined control<br>Protein therapeutic<br>Resistance not yet reported<br>Possibility to genetically engineer lysins<br>Specific bacterial targets<br>Could be used as a prophylactic and for treatment<br>Potential for use in numerous environments (human, animal, food, biofilm, etc.)<br>Can be identified and used from temperate and virulent phages |
| <b>Phage disadvantages</b><br>Need to select for virulent phage to prevent genetic transfer<br>Bacterial strains can develop resistance<br>Many phages can have a limited host range<br>Regulatory and consumer acceptance still required                                                                                                                                                                                                                                                                                                                                           | <b>Lysin disadvantages</b><br>Not self-replicating<br>Protein; therefore, susceptible to inactivation<br>To date not yet successfully applied against Gram-negative bacteria                                                                                                                                                                                                                                              |

(Table 2). As these enzymes break down the cell wall, they have the potential to be used as therapeutic agents in their own right. Table 3 outlines the advantages and disadvantages of using phages and phage lysins as therapeutics for bacterial control. The continuing emergence of phage genome sequences enables the putative identification of many lysins. Indeed, the potential of many phage lysins as therapeutics or biocontrol agents has already been demonstrated and will be described here.

Fischetti and colleagues have exploited these enzymes, which they have termed 'enzymotics', to kill a variety of Gram-positive pathogens (Nelson *et al.*, 2001) reported the prophylactic use of a phage lysin in an *in vivo* model. In this study, phage lysin encoded by the C1 phage was utilized,

which is specific for groups A, C and E streptococci. The addition of 1000 U of purified lysin *in vitro* within 5 s resulted in 100% inhibition of  $10^7$  CFU mL<sup>-1</sup> of group A streptococci. Furthermore, in a mouse model of infection, protection of mice from group A streptococci colonization was evident. In this case, a single dose of lysin (250 U) was added to the oral cavity of mice before the addition of  $10^7$  CFU mL<sup>-1</sup> of group A streptococci. Indeed, in an additional experiment following administration of lysin (500 U) to mice that were heavily colonized with group A streptococci, no detectable streptococci were detected 2 h post-treatment (Nelson *et al.*, 2001). The use of phage lysins to control *S. pneumoniae* was also studied by Fischetti's group (Loeffler *et al.*, 2001; Loeffler & Fischetti, 2003). These

included the use of the purified lysin, Pal, which is active against 15 common serotypes of pneumococci (Fig. 3). Indeed, in a mouse model of infection, mice colonized with *S. pneumoniae* and treated with Pal lysin had undetectable bacterial numbers 5 h post-treatment (Loeffler *et al.*, 2001). Interestingly, in this case, the authors found that the capsule did not inhibit access of the amidase Pal to the cell wall. In the second study, lysin Cpl-1 was also shown to be effective against *S. pneumoniae* in a mouse model of infection as a topical application and when injected into the bloodstream (Loeffler *et al.*, 2003). A combination of Pal and Cpl-1 lysins resulted in an increased killing effect *in vitro* against *S. pneumoniae* (Loeffler & Fischetti, 2003). In addition, Jado *et al.* (2003) used a murine sepsis model to study the ability of pneumococcal phage lysins Pal and Cpl-1 to cure bacteraemia caused by *S. pneumoniae* strain 6B (a multi-drug-resistant serotype and the most common serotype isolated from children with bacteraemia). The group found that by injecting lysin Cpl-1 or Pal 1 h after bacterial challenge with strain 6B, the mice survived, whereas untreated mice challenged with  $5 \times 10^7$  CFU mL<sup>-1</sup> of strain 6B died within 72 h. Moreover, a synergistic effect was observed *in vivo* when both Pal and Cpl-1 were used in combination, as survival rates in animals that received both lysins were higher than in animals that received each alone. More recently, Cpl-1 was successfully used in treating *S. pneumoniae* in a model of endocarditis and bacterial meningitis in rats (Entenza *et al.*, 2005; Grandgirard *et al.*, 2008). In additional studies in mice with Cpl-1 lysin, acute otitis media, which is an infection in children commonly caused by *S. pneumoniae*, was prevented (McCullers *et al.*, 2007).

Phage lysin has also been utilized for the detection and elimination of *Bacillus anthracis* (Schuch *et al.*, 2002). In this case, the lysin was identified from  $\gamma$  phage of *B. anthracis* and was found to kill vegetative cells in addition to germinating spores. Challenge with *B. cereus* strain RSVF1 in a mouse model of infection resulted in death in all cases. However, 13 out of 19 mice recovered fully after injection with PlyG and the remaining six mice survived (Schuch *et al.*, 2002). Interestingly, no resistance was observed to Pal, C1 or PlyG in these studies (Loeffler *et al.*, 2001; Nelson *et al.*, 2001; Schuch *et al.*, 2002). A second lysin active against *B. anthracis* has been reported by Yoong *et al.* (2006). This lysin was designated PlyPH, due to its activity across a large pH range, from 4 to 10.5. In a mice model of infection, c. 40% of mice survived in the PlyPH group compared with 100% death of the control group within 38 h (Yoong *et al.*, 2006).

Recently, lysin PlyV12 was found to not only have activity against its host *E. faecalis* but also other Gram-positive pathogens such as staphylococci and streptococci. In this case, the authors suggested that this may be due to a common surface structure between these pathogens (Yoong

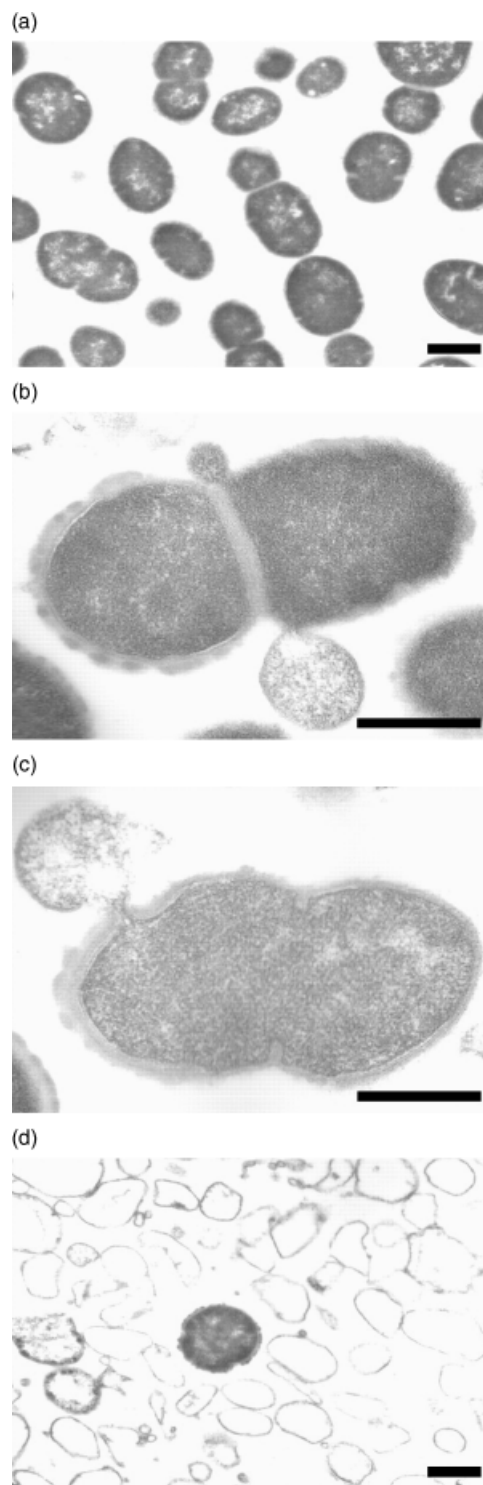

**Fig. 3.** Electron micrographs of *Streptococcus pneumoniae* exposed to Pal. (a) Unexposed control cells. Higher magnification of enzyme-treated cells after a 1-min exposure shows cell membrane protrusion (b) or cytoplasmic leaks from membrane rupture (c) through isolated breaks in the cell wall. After 5 min (d), killing is virtually complete and only empty cell walls are left. Scale bars = 0.5  $\mu$ m. Reproduced from Loeffler *et al.* (2001) with permission.

*et al.*, 2004). Fischetti and colleagues have also studied a lysin active against group B streptococci (GBS), designated PlyGBS (Cheng *et al.*, 2005). PlyGBS was shown to have a broad spectrum of inhibition inhibiting all tested GBS serotypes *in vitro*. In a mouse model of infection, mice were vaginally challenged with  $10^6$  CFU mL<sup>-1</sup> of GBS. Twenty-four hours later mice were treated vaginally with either buffer or PlyGBS lysin and swabs were taken 2 and 4 h later; when compared with the control, a 3 log reduction in GBS cell numbers was demonstrated in the mice that had received the lysin PlyGBS (Cheng *et al.*, 2005).

Phage lysin active against the pathogen *S. aureus* has also been described recently (Rashel *et al.*, 2007). Phage  $\Phi$ MR11 has been described above where it protected mice from staphylococcal infection. This phage was subsequently sequenced and the lysin gene identified (Matsuzaki *et al.*, 2003; Rashel *et al.*, 2007). MV-L lysin was used to treat MRSA in the nasal cavities of mice and complete elimination of bacteria was observed in one of nine mice treated with MV-L lysin. The remaining mice had much lower CFU/nasal cavity numbers than the untreated mice. In an additional experiment with a model of systemic MRSA disease after 60 days, all mice treated with MV-L lysin directly or 30 min after bacterial administration survived compared with 60% mice survival 60 min postbacterial administration (Rashel *et al.*, 2007).

In addition, further *in vitro* work has been performed with lysins. For example, Pritchard *et al.* (2004) also cloned and expressed a lysin from a GBS phage. As GBS are a major cause of neonatal infections, this group studied the host range of the purified recombinant GBS phage lysin and found that it inhibited  $\beta$ -haemolytic streptococcal groups A, B, C, E and G. Zimmer *et al.* (2002) have also reported a phage lysin (ply3626) specifically active against *C. perfringens in vitro*. This organism is a causative pathogen of foodborne illnesses and also results in major economic losses in the poultry industry. Lysins such as LysK (O'Flaherty *et al.*, 2005a), LysH5 (Obeso *et al.*, 2008) and the endolysin from phage phi11 (Donovan *et al.*, 2006b) demonstrated *in vitro* activity against *S. aureus*, including drug-resistant strains in the case of LysK (Fig. 1).

*Listeria monocytogenes* is an important food-poisoning pathogen (McLauchlin *et al.*, 2004) and as such, is a prime target for new antimicrobials such as phage lysins. Loessner *et al.* (1995b) have described phage lysins Ply118, Ply511 and Ply500 encoded by *Listeria* phage A118, A511 and A500, respectively. Lysin Ply118 has been utilized for the disruption of the *Listeria* cell wall for DNA, RNA and protein extraction (Loessner *et al.*, 1995a). Moreover, Ply511 and Ply118 have also been cloned and expressed in *Lactococcus lactis* with the intention of producing lactococcal starter strains with anti-*L. monocytogenes* activity (Gaeng *et al.*, 2000).

Importantly, lytic enzymes originating from phages have huge potential from a therapeutic perspective as these enzymes show no adverse reactions during *in vivo* trials (Jado *et al.*, 2003) and no resistance to them has been discovered (Loeffler *et al.*, 2001; Nelson *et al.*, 2001; Schuch *et al.*, 2002). Another important feature of phage lysins is the capability to produce engineered lysins (Table 3). Lysins Pal and Cpl-1 from pneumococcal phages are among the most extensively studied phage lytic proteins that have demonstrated therapeutic potential. Work by López *et al.* (2004) demonstrated the two-domain structure of pneumococcal lysins; a catalytic and cell wall-binding domain. Further work by this group, which exploited the two-domain architecture of these lysins has included, (1) demonstration that both the binding and catalytic domains of lytic enzymes can be exchanged (Diaz *et al.*, 1990, 1991), (2) construction of a chimeric protein with two lytic activities (Sanz *et al.*, 1996) and (3) the exchange of enzyme specificity between bacterial species by construction of chimeric enzymes (Croux *et al.*, 1993; Lopez & Garcia, 2004). This work has demonstrated the possibility of engineering phage lysins by domain swapping to obtain lytic enzymes with multiple lytic activities and/or multiple binding domains, which have the potential to increase the therapeutic potential of phage lytic enzymes. Advances in structural engineering and proteomics will no doubt advance this field. Already there are studies where groups have truncated some of these lysins to their active 'core' (Donovan *et al.*, 2006a; Horgan *et al.*, 2009) where activity is still maintained in the smaller functional unit. In addition, the lysins discussed here are active against Gram-positive bacteria, but study into the possibility of lysing Gram-negative bacteria is needed. For example, Schuch *et al.* (2009) have described a genetic screen to identify lysins, which may also be applicable to Gram-negative bacteria. Although they lack the ability to self-replicate, as with antibiotics, studies into lysin dosage will be required in future studies. Furthermore, there is no reason why phage lysins cannot be used, where phages have been found to be applicable.

## Concluding remarks

Phages have increasingly become the subject of renewed interest as agents to treat infections in recent years. The studies outlined above clearly show the efficacy of phage in killing human pathogenic bacteria in a number of microbial niches. While the results are very promising, there is still a critical need for well-designed double-blinded placebo-based human clinical trials to examine their efficacy in reducing carriage and treating infection. In an era where antibiotic resistance is causing many problems particularly in nosocomial situations, phage and phage-based technologies may prove to be valuable antimicrobial alternatives for widespread applications in the future.

## Acknowledgements

S.O'F. was supported by a Teagasc Walsh Fellowship and the Food Institutional Research Measure (FIRM) from the Irish Department of Agriculture. We thank Dr Susan Mills for helpful discussions and Dr Gary O'Flynn for providing electron micrographs.

## References

- Abuladze T, Li M, Menetrez MY, Dean T, Senecal A & Sulakvelidze A (2008) Bacteriophages reduce experimental contamination of hard surfaces, tomato, spinach, broccoli, and ground beef by *Escherichia coli* O157:H7. *Appl Environ Microb* **74**: 6230–6238.
- Atterbury RJ, Connerton PL, Dodd CE, Rees CE & Connerton IF (2003) Isolation and characterization of *Campylobacter* bacteriophages from retail poultry. *Appl Environ Microb* **69**: 4511–4518.
- Atterbury RJ, Van Bergen MA, Ortiz F, Lovell MA, Harris JA, De Boer A, Wagenaar JA, Allen VM & Barrow PA (2007) Bacteriophage therapy to reduce *Salmonella* colonization of broiler chickens. *Appl Environ Microb* **73**: 4543–4549.
- Barrow P, Lovell M & Berchieri A Jr (1998) Use of lytic bacteriophage for control of experimental *Escherichia coli* septicemia and meningitis in chickens and calves. *Clin Diagn Lab Immun* **5**: 294–298.
- Bayer ME, Thurow H & Bayer MH (1979) Penetration of the polysaccharide capsule of *Escherichia coli* (Bi161/42) by bacteriophage K29. *Virology* **94**: 95–118.
- Bergh O, Borsheim KY, Bratbak G & Haldal M (1989) High abundance of viruses found in aquatic environments. *Nature* **340**: 467–468.
- Biswas B, Adhya S, Washart P, Paul B, Trostel AN, Powell B, Carlton R & Merrill CR (2002) Bacteriophage therapy rescues mice bacteremic from a clinical isolate of vancomycin-resistant *Enterococcus faecium*. *Infect Immun* **70**: 204–210.
- Boyd EF & Brussow H (2002) Common themes among bacteriophage-encoded virulence factors and diversity among the bacteriophages involved. *Trends Microbiol* **10**: 521–529.
- Bozdogan B & Appelbaum PC (2004) Macrolide resistance in Streptococci and *Haemophilus influenzae*. *Clin Lab Med* **24**: 455–475.
- Bruttin A & Brussow H (2005) Human volunteers receiving *Escherichia coli* phage T4 orally: a safety test of phage therapy. *Antimicrob Agents Ch* **49**: 2874–2878.
- Bull JJ, Levin BR, DeRouin T, Walker N & Bloch CA (2002) Dynamics of success and failure in phage and antibiotic therapy in experimental infections. *BMC Microbiol* **2**: 35.
- Carlton RM (1999) Phage therapy: past history and future prospects. *Arch Immunol Ther Ex* **47**: 267–274.
- Carlton RM, Noordman WH, Biswas B, de Meester ED & Loessner MJ (2005) Bacteriophage P100 for control of *Listeria monocytogenes* in foods: genome sequence, bioinformatic analyses, oral toxicity study, and application. *Regul Toxicol Pharm* **43**: 301–312.
- Cerca N, Oliveira R & Azeredo J (2007) Susceptibility of *Staphylococcus epidermidis* planktonic cells and biofilms to the lytic action of *Staphylococcus* bacteriophage K. *Lett Appl Microbiol* **45**: 313–317.
- Cervený KE, DePaola A, Duckworth DH & Gulig PA (2002) Phage therapy of local and systemic disease caused by *Vibrio vulnificus* in iron-dextran-treated mice. *Infect Immun* **70**: 6251–6262.
- Chanishvili N, Chanishvili T, Tediashvili M & Barrow PA (2001) Phages and their application against drug-resistant bacteria. *J Chem Technol Biot* **76**: 689–699.
- Chen J & Novick RP (2009) Phage-mediated intergeneric transfer of toxin genes. *Science* **323**: 139–141.
- Cheng Q, Nelson D, Zhu S & Fischetti VA (2005) Removal of group B streptococci colonizing the vagina and oropharynx of mice with a bacteriophage lytic enzyme. *Antimicrob Agents Ch* **49**: 111–117.
- Chhibber S, Kaur S & Kumari S (2008) Therapeutic potential of bacteriophage in treating *Klebsiella pneumoniae* B5055-mediated lobar pneumonia in mice. *J Med Microbiol* **57**: 1508–1513.
- Chibani-Chennoufi S, Bruttin A, Dillmann ML & Brussow H (2004a) Phage–host interaction: an ecological perspective. *J Bacteriol* **186**: 3677–3686.
- Chibani-Chennoufi S, Sidoti J, Bruttin A, Kutter E, Sarker S & Brussow H (2004b) *In vitro* and *in vivo* bacteriolytic activities of *Escherichia coli* phages: implications for phage therapy. *Antimicrob Agents Ch* **48**: 2558–2569.
- Cislo M, Dabrowski M, Weber-Dabrowska B & Woyton A (1987) Bacteriophage treatment of suppurative skin infections. *Arch Immunol Ther Ex* **35**: 175–183.
- Croux C, Ronda C, Lopez R & Garcia JL (1993) Interchange of functional domains switches enzyme specificity: construction of a chimeric pneumococcal–clostridial cell wall lytic enzyme. *Mol Microbiol* **9**: 1019–1025.
- Diaz E, Lopez R & Garcia JL (1990) Chimeric phage–bacterial enzymes: a clue to the modular evolution of genes. *P Natl Acad Sci USA* **87**: 8125–8129.
- Diaz E, Lopez R & Garcia JL (1991) Chimeric pneumococcal cell wall lytic enzymes reveal important physiological and evolutionary traits. *J Biol Chem* **266**: 5464–5471.
- Di Perri G & Bonora S (2004) Which agents should we use for the treatment of multidrug-resistant *Mycobacterium tuberculosis*? *J Antimicrob Chemoth* **54**: 593–602.
- Donovan DM, Dong S, Garrett W, Rousseau GM, Moineau S & Pritchard DG (2006a) Peptidoglycan hydrolase fusions maintain their parental specificities. *Appl Environ Microb* **72**: 2988–2996.
- Donovan DM, Lardeo M & Foster-Frey J (2006b) Lysis of staphylococcal mastitis pathogens by bacteriophage phi11 endolysin. *FEMS Microbiol Lett* **265**: 133–139.
- Doolittle MM, Cooney JJ & Caldwell DE (1995) Lytic infection of *Escherichia coli* biofilms by bacteriophage T4. *Can J Microbiol* **41**: 12–18.

- Doolittle MM, Cooney JJ & Caldwell DE (1996) Tracing the interaction of bacteriophage with bacterial biofilms using fluorescent and chromogenic probes. *J Ind Microbiol* **16**: 331–341.
- Entenza JM, Loeffler JM, Grandgirard D, Fischetti VA & Moreillon P (2005) Therapeutic effects of bacteriophage Cpl-1 lysin against *Streptococcus pneumoniae* endocarditis in rats. *Antimicrob Agents Ch* **49**: 4789–4792.
- Fiorentin L, Vieira ND & Barioni W Jr (2005) Oral treatment with bacteriophages reduces the concentration of *Salmonella* Enteritidis PT4 in caecal contents of broilers. *Avian Pathol* **34**: 258–263.
- Fluit AC (2005) Towards more virulent and antibiotic-resistant *Salmonella*? *FEMS Immunol Med Mic* **43**: 1–11.
- Fortuna W, Miedzybrodzki R, Weber-Dabrowska B & Gorski A (2008) Bacteriophage therapy in children: facts and prospects. *Med Sci Monitor* **14**: RA126–RA132.
- Gaeng S, Scherer S, Neve H & Loessner MJ (2000) Gene cloning and expression and secretion of *Listeria monocytogenes* bacteriophage-lytic enzymes in *Lactococcus lactis*. *Appl Environ Microb* **66**: 2951–2958.
- Gill JJ, Pacan JC, Carson ME, Leslie KE, Griffiths MW & Sabour PM (2006a) Efficacy and pharmacokinetics of bacteriophage therapy in treatment of subclinical *Staphylococcus aureus* mastitis in lactating dairy cattle. *Antimicrob Agents Ch* **50**: 2912–2918.
- Gill JJ, Sabour PM, Leslie KE & Griffiths MW (2006b) Bovine whey proteins inhibit the interaction of *Staphylococcus aureus* and bacteriophage K. *J Appl Microbiol* **101**: 377–386.
- Goode D, Allen VM & Barrow PA (2003) Reduction of experimental *Salmonella* and *Campylobacter* contamination of chicken skin by application of lytic bacteriophages. *Appl Environ Microb* **69**: 5032–5036.
- Goodridge LD (2004) Bacteriophage biocontrol of plant pathogens: fact or fiction? *Trends Biotechnol* **22**: 384–385.
- Gorski A, Borysowski J, Miedzybrodzki R & Weber-Dabrowska B (2007) Bacteriophages in medicine. *Bacteriophage: Genetics and Molecular Biology* (McGrath S & Van Sinderen D, eds), pp. 125–158. Caister Academic Press, Norfolk, UK.
- Grandgirard D, Loeffler JM, Fischetti VA & Leib SL (2008) Phage lytic enzyme cpl-1 for antibacterial therapy in experimental pneumococcal meningitis. *J Infect Dis* **197**: 1519–1522.
- Greer GG (1986) Homologous bacteriophage control of *Pseudomonas* growth and beef spoilage. *J Food Prot* **49**: 104–109.
- Greer GG & Dilts BD (1990) Inability of a bacteriophage pool to control beef spoilage. *Int J Food Microbiol* **10**: 331–342.
- Greer GG & Dilts BD (2002) Control of *Brochothrix thermosphacta* spoilage of pork adipose tissue using bacteriophages. *J Food Prot* **65**: 861–863.
- Guttman B, Raya R & Kutter E (2005) Basic phage biology. *Bacteriophages, Biology and Applications* (Kutter E & Sulakvelidze A, eds), pp. 29–66. CRC Press, Boca Raton, FL.
- Hendrix RW, Smith MC, Burns RN, Ford ME & Hatfull GF (1999) Evolutionary relationships among diverse bacteriophages and prophages: all the world's a phage. *P Natl Acad Sci USA* **96**: 2192–2197.
- Hendrix RW, Lawrence JG, Hatfull GF & Casjens S (2000) The origins and ongoing evolution of viruses. *Trends Microbiol* **8**: 504–508.
- Horgan M, O'Flynn G, Garry J, Cooney J, Coffey A, Fitzgerald GF, Ross RP & McAuliffe O (2009) The phage lysin, LysK, can be truncated to its CHAP domain and retain lytic activity against live antibiotic-resistant staphylococci. *Appl Environ Microb* **75**: 872–874.
- Huff WE, Huff GR, Rath NC, Balog JM & Donoghue AM (2002a) Prevention of *Escherichia coli* infection in broiler chickens with a bacteriophage aerosol spray. *Poultry Sci* **81**: 1486–1491.
- Huff WE, Huff GR, Rath NC, Balog JM, Xie H, Moore PA Jr & Donoghue AM (2002b) Prevention of *Escherichia coli* respiratory infection in broiler chickens with bacteriophage (SPR02). *Poultry Sci* **81**: 437–441.
- Huff WE, Huff GR, Rath NC, Balog JM & Donoghue AM (2003a) Bacteriophage treatment of a severe *Escherichia coli* respiratory infection in broiler chickens. *Avian Dis* **47**: 1399–1405.
- Huff WE, Huff GR, Rath NC, Balog JM & Donoghue AM (2003b) Evaluation of aerosol spray and intramuscular injection of bacteriophage to treat an *Escherichia coli* respiratory infection. *Poultry Sci* **82**: 1108–1112.
- Huff WE, Huff GR, Rath NC, Balog JM & Donoghue AM (2004) Therapeutic efficacy of bacteriophage and Baytril (enrofloxacin) individually and in combination to treat colibacillosis in broilers. *Poultry Sci* **83**: 1944–1947.
- Huff WE, Huff GR, Rath NC, Balog JM & Donoghue AM (2005) Alternatives to antibiotics: utilization of bacteriophage to treat colibacillosis and prevent foodborne pathogens. *Poultry Sci* **84**: 655–659.
- Huff WE, Huff GR, Rath NC & Donoghue AM (2006) Evaluation of the influence of bacteriophage titer on the treatment of colibacillosis in broiler chickens. *Poultry Sci* **85**: 1373–1377.
- Jacobs MR (2004) Building in efficacy: developing solutions to combat drug-resistant *S. pneumoniae*. *Clin Microbiol Infect* **10** (suppl 2): 18–27.
- Jado I, Lopez R, Garcia E, Fenoll A, Casal J & Garcia P (2003) Phage lytic enzymes as therapy for antibiotic-resistant *Streptococcus pneumoniae* infection in a murine sepsis model. *J Antimicrob Chemother* **52**: 967–973.
- Jain R & Danziger LH (2004) Multidrug-resistant acinetobacter infections: an emerging challenge to clinicians. *Ann Pharmacother* **38**: 1449–1459.
- Jikia D, Chkhaidze N, Imedashvili E, Mgaloblishvili I, Tsitlanadze G, Katsarava R, Morris JG Jr & Sulakvelidze A (2005) The use of a novel biodegradable preparation capable of the sustained release of bacteriophages and ciprofloxacin, in the complex treatment of multidrug-resistant *Staphylococcus aureus*-infected local radiation injuries caused by exposure to Sr90. *Clin Exp Dermatol* **30**: 23–26.
- Lang LH (2006) FDA approves use of bacteriophages to be added to meat and poultry products. *Gastroenterology* **131**: 1370.



- Leverentz B, Conway WS, Alavidze Z, Janisiewicz WJ, Fuchs Y, Camp MJ, Chighladze E & Sulakvelidze A (2001) Examination of bacteriophage as a biocontrol method for *Salmonella* on fresh-cut fruit: a model study. *J Food Prot* **64**: 1116–1121.
- Leverentz B, Conway WS, Camp MJ, Janisiewicz WJ, Abuladze T, Yang M, Saftner R & Sulakvelidze A (2003) Biocontrol of *Listeria monocytogenes* on fresh-cut produce by treatment with lytic bacteriophages and a bacteriocin. *Appl Environ Microb* **69**: 4519–4526.
- Leverentz B, Conway WS, Janisiewicz W & Camp MJ (2004) Optimizing concentration and timing of a phage spray application to reduce *Listeria monocytogenes* on honeydew melon tissue. *J Food Prot* **67**: 1682–1686.
- Lindmark H, Harbom B, Thebo L, Andersson L, Hedin G, Osterman B, Lindberg T, Andersson Y, Westoo A & Olsson Engvall E (2004) Genetic characterization and antibiotic resistance of *Campylobacter jejuni* isolated from meats, water, and humans in Sweden. *J Clin Microbiol* **42**: 700–706.
- Linkous DA & Oliver JD (1999) Pathogenesis of *Vibrio vulnificus*. *FEMS Microbiol Lett* **174**: 207–214.
- Loc Carrillo C, Atterbury RJ, el-Shibiny A, Connerton PL, Dillon E, Scott A & Connerton IF (2005) Bacteriophage therapy to reduce *Campylobacter jejuni* colonization of broiler chickens. *Appl Environ Microb* **71**: 6554–6563.
- Loeffler JM & Fischetti VA (2003) Synergistic lethal effect of a combination of phage lytic enzymes with different activities on penicillin-sensitive and -resistant *Streptococcus pneumoniae* strains. *Antimicrob Agents Ch* **47**: 375–377.
- Loeffler JM, Nelson D & Fischetti VA (2001) Rapid killing of *Streptococcus pneumoniae* with a bacteriophage cell wall hydrolase. *Science* **294**: 2170–2172.
- Loeffler JM, Djurkovic S & Fischetti VA (2003) Phage lytic enzyme Cpl-1 as a novel antimicrobial for pneumococcal bacteremia. *Infect Immun* **71**: 6199–6204.
- Loessner MJ, Schneider A & Scherer S (1995a) A new procedure for efficient recovery of DNA, RNA, and proteins from *Listeria* cells by rapid lysis with a recombinant bacteriophage endolysin. *Appl Environ Microb* **61**: 1150–1152.
- Loessner MJ, Wendlinger G & Scherer S (1995b) Heterogeneous endolysins in *Listeria monocytogenes* bacteriophages: a new class of enzymes and evidence for conserved holin genes within the siphoviral lysis cassettes. *Mol Microbiol* **16**: 1231–1241.
- Lopez R & Garcia E (2004) Recent trends on the molecular biology of pneumococcal capsules, lytic enzymes, and bacteriophage. *FEMS Microbiol Rev* **28**: 553–580.
- López R, García E & García P (2004) Enzymes for anti-infective therapy: phage lysins. *Drug Discov Today* **1**: 469–474.
- Lowy FD (2003) Antimicrobial resistance: the example of *Staphylococcus aureus*. *J Clin Invest* **111**: 1265–1273.
- Lu TK & Collins JJ (2007) Dispersing biofilms with engineered enzymatic bacteriophage. *P Natl Acad Sci USA* **104**: 11197–11202.
- Matsuzaki S, Yasuda M, Nishikawa H *et al.* (2003) Experimental protection of mice against lethal *Staphylococcus aureus* infection by novel bacteriophage phi MR11. *J Infect Dis* **187**: 613–624.
- McCullers JA, Karlstrom A, Iverson AR, Loeffler JM & Fischetti VA (2007) Novel strategy to prevent otitis media caused by colonizing *Streptococcus pneumoniae*. *PLoS Pathog* **3**: e28.
- Mc Grath S & Van Sinderen D (2007) *Bacteriophage Genetics and Molecular Biology*. Caister Academic Press, Norfolk, UK.
- McLauchlin J, Mitchell RT, Smerdon WJ & Jewell K (2004) *Listeria monocytogenes* and listeriosis: a review of hazard characterisation for use in microbiological risk assessment of foods. *Int J Food Microbiol* **92**: 15–33.
- McVay CS, Velasquez M & Fralick JA (2007) Phage therapy of *Pseudomonas aeruginosa* infection in a mouse burn wound model. *Antimicrob Agents Ch* **51**: 1934–1938.
- Megraud F (2004) *H. pylori* antibiotic resistance: prevalence, importance, and advances in testing. *Gut* **53**: 1374–1384.
- Merril CR, Biswas B, Carlton R, Jensen NC, Creed GJ, Zullo S & Adhya S (1996) Long-circulating bacteriophage as antibacterial agents. *P Natl Acad Sci USA* **93**: 3188–3192.
- Nakai T & Park SC (2002) Bacteriophage therapy of infectious diseases in aquaculture. *Res Microbiol* **153**: 13–18.
- Nakai T, Sugimoto R, Park KH, Matsuoka S, Mori K, Nishioka T & Maruyama K (1999) Protective effects of bacteriophage on experimental *Lactococcus garvieae* infection in yellowtail. *Dis Aquat Organ* **37**: 33–41.
- Nelson D, Loomis L & Fischetti VA (2001) Prevention and elimination of upper respiratory colonization of mice by group A streptococci by using a bacteriophage lytic enzyme. *P Natl Acad Sci USA* **98**: 4107–4112.
- Nishikawa H, Yasuda M, Uchiyama J *et al.* (2008) T-even-related bacteriophages as candidates for treatment of *Escherichia coli* urinary tract infections. *Arch Virol* **153**: 507–515.
- Norrby SR, Nord CE & Finch R (2005) Lack of development of new antimicrobial drugs: a potential serious threat to public health. *Lancet Infect Dis* **5**: 115–119.
- Obeso JM, Martinez B, Rodriguez A & Garcia P (2008) Lytic activity of the recombinant staphylococcal bacteriophage PhiH5 endolysin active against *Staphylococcus aureus* in milk. *Int J Food Microbiol* **128**: 212–218.
- O'Flaherty S, Coffey A, Edwards R, Meaney W, Fitzgerald GF & Ross RP (2004) Genome of staphylococcal phage K: a new lineage of Myoviridae infecting Gram-positive bacteria with a low G+C content. *J Bacteriol* **186**: 2862–2871.
- O'Flaherty S, Coffey A, Meaney W, Fitzgerald GF & Ross RP (2005a) The recombinant phage lysin LysK has a broad spectrum of lytic activity against clinically relevant staphylococci, including methicillin-resistant *Staphylococcus aureus*. *J Bacteriol* **187**: 7161–7164.
- O'Flaherty S, Coffey A, Meaney WJ, Fitzgerald GF & Ross RP (2005b) Inhibition of bacteriophage K proliferation on *Staphylococcus aureus* in raw bovine milk. *Lett Appl Microbiol* **41**: 274–279.
- O'Flaherty S, Ross RP, Flynn J, Meaney WJ, Fitzgerald GF & Coffey A (2005c) Isolation and characterization of two anti-staphylococcal bacteriophages specific for pathogenic

- Staphylococcus aureus* associated with bovine infections. *Lett Appl Microbiol* **41**: 482–486.
- O'Flaherty S, Ross RP, Meaney W, Fitzgerald GF, Elbreki MF & Coffey A (2005d) Potential of the polyvalent anti-*Staphylococcus* bacteriophage K for control of antibiotic-resistant staphylococci from hospitals. *Appl Environ Microb* **71**: 1836–1842.
- O'Flynn G, Ross RP, Fitzgerald GF & Coffey A (2004) Evaluation of a cocktail of three bacteriophages for biocontrol of *Escherichia coli* O157:H7. *Appl Environ Microb* **70**: 3417–3424.
- O'Flynn G, Coffey A, Fitzgerald GF & Ross RP (2006) The newly isolated lytic bacteriophages st104a and st104b are highly virulent against *Salmonella enterica*. *J Appl Microbiol* **101**: 251–259.
- O'Flynn G, Coffey A, Fitzgerald G & Ross RP (2007) *Salmonella enterica* phage-resistant mutant colonies display an unusual phenotype in the presence of phage Felix 01. *Lett Appl Microbiol* **45**: 581–585.
- Ong CT, Kuti JL, Nightingale CH & Nicolau DP (2004) Emerging *Pseudomonas aeruginosa* resistance: implications in clinical practise. *Conn Med* **68**: 11–15.
- Park SC & Nakai T (2003) Bacteriophage control of *Pseudomonas plecoglossicida* infection in ayu *Plecoglossus altivelis*. *Dis Aquat Organ* **53**: 33–39.
- Park SC, Shimamura I, Fukunaga M, Mori KI & Nakai T (2000) Isolation of bacteriophages specific to a fish pathogen, *Pseudomonas plecoglossicida*, as a candidate for disease control. *Appl Environ Microb* **66**: 1416–1422.
- Pritchard DG, Dong S, Baker JR & Engler JA (2004) The bifunctional peptidoglycan lysin of *Streptococcus agalactiae* bacteriophage B30. *Microbiology* **150**: 2079–2087.
- Projan SJ & Shlaes DM (2004) Antibacterial drug discovery: is it all downhill from here? *Clin Microbiol Infect* **10** (suppl 4): 18–22.
- Ramesh V, Fralick JA & Rolfe RD (1999) Prevention of *Clostridium difficile*-induced ileocectitis with bacteriophage. *Anaerobe* **5**: 69–78.
- Rashel M, Uchiyama J, Ujihara T et al. (2007) Efficient elimination of multidrug-resistant *Staphylococcus aureus* by cloned lysin derived from bacteriophage phi MR11. *J Infect Dis* **196**: 1237–1247.
- Raya RR, Varey P, Oot RA, Dyen MR, Callaway TR, Edrington TS, Kutter EM & Brabban AD (2006) Isolation and characterization of a new T-even bacteriophage, CEV1, and determination of its potential to reduce *Escherichia coli* O157:H7 levels in sheep. *Appl Environ Microb* **72**: 6405–6410.
- Razavi B, Apisarnthanarak A & Mundy LM (2007) *Clostridium difficile*: emergence of hypervirulence and fluoroquinolone resistance. *Infection* **35**: 300–307.
- Rohwer F & Edwards R (2002) The phage proteomic tree: a genome-based taxonomy for phage. *J Bacteriol* **184**: 4529–4535.
- Roy B, Ackermann HW, Pandian S, Picard G & Goulet J (1993) Biological inactivation of adhering *Listeria monocytogenes* by listeria phages and a quaternary ammonium compound. *Appl Environ Microb* **59**: 2914–2917.
- Saenz Y, Brinas L, Dominguez E, Ruiz J, Zarazaga M, Vila J & Torres C (2004) Mechanisms of resistance in multiple-antibiotic-resistant *Escherichia coli* strains of human, animal, and food origins. *Antimicrob Agents Ch* **48**: 3996–4001.
- Sanz JM, Garcia P & Garcia JL (1996) Construction of a multifunctional pneumococcal murein hydrolase by module assembly. *Eur J Biochem* **235**: 601–605.
- Sass P & Bierbaum G (2007) Lytic activity of recombinant bacteriophage phi11 and phi12 endolysins on whole cells and biofilms of *Staphylococcus aureus*. *Appl Environ Microb* **73**: 347–352.
- Schuch R, Nelson D & Fischetti VA (2002) A bacteriolytic agent that detects and kills *Bacillus anthracis*. *Nature* **418**: 884–889.
- Schuch R, Fischetti VA & Nelson DC (2009) A genetic screen to identify bacteriophage lysins. *Method Mol Biol* **502**: 307–319.
- Sheng H, Knecht HJ, Kudva IT & Hovde CJ (2006) Application of bacteriophages to control intestinal *Escherichia coli* O157:H7 levels in ruminants. *Appl Environ Microb* **72**: 5359–5366.
- Sillankorva S, Oliveira R, Vieira MJ, Sutherland IW & Azeredo J (2004) Bacteriophage Phi S1 infection of *Pseudomonas fluorescens* planktonic cells versus biofilms. *Biofouling* **20**: 133–138.
- Slopek S, Durlakowa I, Kucharewicz-Krukowska B, Dabrowski M & Bisikiewicz R (1983) Results of bacteriophage treatment of suppurative bacterial infections. *Arch Immunol Ther Ex* **31**: 293–327.
- Slopek S, Weber-Dabrowska B, Dabrowski M & Kucharewicz-Krukowska A (1987) Results of bacteriophage treatment of suppurative bacterial infections in the years 1981–1986. *Arch Immunol Ther Ex* **35**: 569–583.
- Smith HW & Huggins MB (1982) Successful treatment of experimental *Escherichia coli* infections in mice using phage: its general superiority over antibiotics. *J Gen Microbiol* **128**: 307–318.
- Smith HW & Huggins MB (1983) Effectiveness of phages in treating experimental *Escherichia coli* diarrhoea in calves, piglets and lambs. *J Gen Microbiol* **129**: 2659–2675.
- Smith HW, Huggins MB & Shaw KM (1987a) Factors influencing the survival and multiplication of bacteriophages in calves and in their environment. *J Gen Microbiol* **133**: 1127–1135.
- Smith HW, Huggins MB & Shaw KM (1987b) The control of experimental *Escherichia coli* diarrhoea in calves by means of bacteriophages. *J Gen Microbiol* **133**: 1111–1126.
- Smith HW, Huggins MB & Shaw KM (1987c) Factors influencing the survival and multiplication of bacteriophages in calves and in their environment. *J Gen Microbiol* **133**: 1127–1135.
- Soothill JS (1994) Bacteriophage prevents destruction of skin grafts by *Pseudomonas aeruginosa*. *Burns* **20**: 209–211.
- Sulakvelidze A (2001) Bacteriophages as therapeutic agents. *Ann Med* **33**: 507–509.
- Sulakvelidze A & Barrow P (2005) Phage therapy in animals and agribusiness. *Bacteriophages Biology and Applications* (Kutter E & Sulakvelidze A, eds), pp. 335–380. CRC Press, Boca Raton, FL.

- Sulakvelidze A & Kutter E (2005) Bacteriophage therapy in humans. *Bacteriophages, Biology and History* (Kutter E & Sulakvelidze A, eds), pp. 381–436. CRC Press, Boca Raton, FL.
- Sulakvelidze A, Alavidze Z & Morris JG Jr (2001) Bacteriophage therapy. *Antimicrob Agents Ch* **45**: 649–659.
- Summers WC (1999) *Felix d'Herelle and the Origins of Molecular Biology*. Yale University Press New Haven, CT.
- Summers WC (2001) Bacteriophage therapy. *Annu Rev Microbiol* **55**: 437–451.
- Tanji Y, Shimada T, Fukudomi H, Miyana K, Nakai Y & Unno H (2005) Therapeutic use of phage cocktail for controlling *Escherichia coli* O157:H7 in gastrointestinal tract of mice. *J Biosci Bioeng* **100**: 280–287.
- Toro H, Price SB, McKee AS, Hoerr FJ, Krehling J, Perdue M & Bauermeister L (2005) Use of bacteriophages in combination with competitive exclusion to reduce *Salmonella* from infected chickens. *Avian Dis* **49**: 118–124.
- Uchiyama J, Rashed M, Takemura I, Wakiguchi H & Matsuzaki S (2008) *In silico* and *in vivo* evaluation of bacteriophage {phi}EF24C, a candidate for treatment of *Enterococcus faecalis* infections. *Appl Environ Microb* **74**: 4149–4163.
- Vinodkumar CS, Kalsurmath S & Neelagund YF (2008) Utility of lytic bacteriophage in the treatment of multidrug-resistant *Pseudomonas aeruginosa* septicemia in mice. *Indian J Pathol Microbiol* **51**: 360–366.
- Wagenaar JA, Van Bergen MA, Mueller MA, Wassenaar TM & Carlton RM (2005) Phage therapy reduces *Campylobacter jejuni* colonization in broilers. *Vet Microbiol* **109**: 275–283.
- Wang J, Hu B, Xu M *et al.* (2006a) Use of bacteriophage in the treatment of experimental animal bacteremia from imipenem-resistant *Pseudomonas aeruginosa*. *Int J Mol Med* **17**: 309–317.
- Wang J, Hu B, Xu M *et al.* (2006b) Therapeutic effectiveness of bacteriophages in the rescue of mice with extended spectrum beta-lactamase-producing *Escherichia coli* bacteremia. *Int J Mol Med* **17**: 347–355.
- Weber-Dabrowska B, Mulczyk M & Gorski A (2000) Bacteriophage therapy of bacterial infections: an update of our institute's experience. *Arch Immunol Ther Ex* **48**: 547–551.
- Weber-Dabrowska B, Mulczyk M & Gorski A (2001) Bacteriophage therapy for infections in cancer patients. *Clin Applied Immunol Rev* **1**: 131–134.
- Weber-Dabrowska B, Mulczyk M & Gorski A (2003) Bacteriophages as an efficient therapy for antibiotic-resistant septicemia in man. *Transplant Proc* **35**: 1385–1386.
- Weinbauer MG (2004) Ecology of prokaryotic viruses. *FEMS Microbiol Rev* **28**: 127–181.
- Whichard JM, Sriranganathan N & Pierson FW (2003) Suppression of *Salmonella* growth by wild-type and large-plaque variants of bacteriophage Felix O1 in liquid culture and on chicken frankfurters. *J Food Prot* **66**: 220–225.
- Whitman WB, Coleman DC & Wiebe WJ (1998) Prokaryotes: the unseen majority. *P Natl Acad Sci USA* **95**: 6578–6583.
- Wills QF, Kerrigan C & Soothill JS (2005) Experimental bacteriophage protection against *Staphylococcus aureus* abscesses in a rabbit model. *Antimicrob Agents Ch* **49**: 1220–1221.
- Yoong P, Schuch R, Nelson D & Fischetti VA (2004) Identification of a broadly active phage lytic enzyme with lethal activity against antibiotic-resistant *Enterococcus faecalis* and *Enterococcus faecium*. *J Bacteriol* **186**: 4808–4812.
- Yoong P, Schuch R, Nelson D & Fischetti VA (2006) PlyPH, a bacteriolytic enzyme with a broad pH range of activity and lytic action against *Bacillus anthracis*. *J Bacteriol* **188**: 2711–2714.
- Zhang Y (2008) I-TASSER server for protein 3D structure prediction. *BMC Bioinformatics* **9**: 40.
- Zimmer M, Vukov N, Scherer S & Loessner MJ (2002) The murein hydrolase of the bacteriophage phi3626 dual lysis system is active against all tested *Clostridium perfringens* strains. *Appl Environ Microb* **68**: 5311–5317.
